# Supplementary material
Source: ML conference proceedings conference paper supplement (https://proceedings.neurips.cc/paper_files/paper/2022/hash/0a166a3d98720697d9028bbe592fa177-Abstract.html)
Supplement: Supplementary file 1 [file 0a166a3d98720697d9028bbe592fa177-Supplemental-Conference.zip]

Archive with 32 entries (29 files):
- supplement/
- __MACOSX/._supplement
- supplement/.DS_Store
- __MACOSX/supplement/._.DS_Store
- supplement/Code/
- __MACOSX/supplement/._Code
- supplement/Appendix_Adaptive_Data_Debiasing_through_Bounded_Exploration_NeurIPS_2022.pdf
- __MACOSX/supplement/._Appendix_Adaptive_Data_Debiasing_through_Bounded_Exploration_NeurIPS_2022.pdf
- supplement/Code/.DS_Store
- __MACOSX/supplement/Code/._.DS_Store
- supplement/Code/Beta_Experiment.ipynb
- __MACOSX/supplement/Code/._Beta_Experiment.ipynb
- supplement/Code/Adult_FICO_Gaussian_Fair.ipynb
- __MACOSX/supplement/Code/._Adult_FICO_Gaussian_Fair.ipynb
- supplement/Code/Pure_Exploration_Baseline.ipynb
- __MACOSX/supplement/Code/._Pure_Exploration_Baseline.ipynb
- supplement/Code/Exploitation_Only_Baseline.ipynb
- __MACOSX/supplement/Code/._Exploitation_Only_Baseline.ipynb
- supplement/Code/Gaussian_Experiment.ipynb
- __MACOSX/supplement/Code/._Gaussian_Experiment.ipynb
- supplement/Code/.ipynb_checkpoints/
- __MACOSX/supplement/Code/._.ipynb_checkpoints
- supplement/Code/.ipynb_checkpoints/Exploitation_Only_Baseline-checkpoint.ipynb
- __MACOSX/supplement/Code/.ipynb_checkpoints/._Exploitation_Only_Baseline-checkpoint.ipynb
- supplement/Code/.ipynb_checkpoints/Adult_FICO_Gaussian_Fair-checkpoint.ipynb
- __MACOSX/supplement/Code/.ipynb_checkpoints/._Adult_FICO_Gaussian_Fair-checkpoint.ipynb
- supplement/Code/.ipynb_checkpoints/Gaussian_Experiment-checkpoint.ipynb
- __MACOSX/supplement/Code/.ipynb_checkpoints/._Gaussian_Experiment-checkpoint.ipynb
- supplement/Code/.ipynb_checkpoints/Pure_Exploration_Baseline-checkpoint.ipynb
- __MACOSX/supplement/Code/.ipynb_checkpoints/._Pure_Exploration_Baseline-checkpoint.ipynb
- supplement/Code/.ipynb_checkpoints/Beta_Experiment-checkpoint.ipynb
- __MACOSX/supplement/Code/.ipynb_checkpoints/._Beta_Experiment-checkpoint.ipynb
