# Supplementary material
Source: ML conference proceedings conference paper supplement (https://proceedings.neurips.cc/paper_files/paper/2022/hash/0a166a3d98720697d9028bbe592fa177-Abstract.html)
Supplement: Supplementary file 1 [file 0a166a3d98720697d9028bbe592fa177-Supplemental-Conference.zip › supplement/Code/Adult_FICO_Gaussian_Fair.ipynb]

# %% [code]
from IPython.core.display import display, HTML
display(HTML("<style>.container { width:100% !important; }</style>"))

# %% [code]
import pandas as pd
import matplotlib.pylab as plt
import numpy as np


# %% [code]
from responsibly.dataset import build_FICO_dataset

FICO = build_FICO_dataset()
FICO.keys()


# %% [code]
print (FICO['pdf'])
print (np.sum(FICO['pdf']))

# %% [code]
print (FICO['cdf'])

# %% [code]
f, ax = plt.subplots(1, figsize=(7, 5))

FICO['cdf'].plot(ax=ax)

plt.title('CDF by Group')
plt.ylabel('Cumulative Probability');

# %% [code]
from responsibly.fairness.metrics import plot_roc_curves
plot_roc_curves(FICO['rocs'], FICO['aucs'],
                figsize=(7, 5));

# %% [code]
from responsibly.fairness.interventions.threshold import (find_thresholds,
                                                          plot_fpt_tpr,
                                                          plot_roc_curves_thresholds,
                                                          plot_costs,
                                                          plot_thresholds)
plot_fpt_tpr(FICO['rocs'], figsize=(15, 7),
             title_fontsize=15, text_fontsize=15);

# %% [code]
COST_MATRIX = [[0, -5/6],
               [0,  1/6]]
thresholds_data = find_thresholds(FICO['rocs'],
                                  FICO['proportions'],
                                  FICO['base_rate'],
                                  FICO['base_rates'],
                                  COST_MATRIX)
plot_roc_curves_thresholds(FICO['rocs'], thresholds_data,
                           figsize=(7, 7),
                           title_fontsize=20, text_fontsize=15);
plt.xlim(0, 0.3)
plt.ylim(0.4, 1);

# %% [code]
thresholds_data

# %% [code]
plot_thresholds(thresholds_data,
                xlim=(0, 100), figsize=(7, 7),
                title_fontsize=20, text_fontsize=15);

# %% [code]
thresholds_data.keys()

# %% [code]
COST_MATRIX = [[0, -5/6],
               [0,  1/6]]


# %% [code]
print (thresholds_data['single'])

# %% [code]
print (thresholds_data['fnr'])

# %% [code]
print (thresholds_data['min_cost'])

# %% [code]


# %% [markdown]
# Adaptive Data Debiasing through Bounded Exploraiton and Fairness

This code is under Adult dataset with fairness setting

# %% [markdown]
Load data from the website, and data preprocessing

# %% [code]
import pandas as pd
import numpy as np
from sklearn.model_selection import train_test_split
from sklearn.linear_model import LogisticRegression
import sklearn.preprocessing as preprocessing
from scipy.stats import beta
from sklearn.utils import shuffle
from sklearn import metrics
from sklearn.metrics import confusion_matrix
import matplotlib.pyplot as plt
from responsibly.fairness.interventions.threshold import find_thresholds

features = ["Age", "Workclass", "fnlwgt", "Education", "Education-Num", "Martial Status",
        "Occupation", "Relationship", "Race", "Sex", "Capital Gain", "Capital Loss",
        "Hours per week", "Country", "Target"] 

train_url = 'https://archive.ics.uci.edu/ml/machine-learning-databases/adult/adult.data'
test_url = 'https://archive.ics.uci.edu/ml/machine-learning-databases/adult/adult.test'

# Load train and test data
original_train = pd.read_csv(train_url, names=features, sep=r'\s*,\s*', 
                             engine='python', na_values="?")
original_test = pd.read_csv(test_url, names=features, sep=r'\s*,\s*', 
                            engine='python', na_values="?", skiprows=1)

original = pd.concat([original_train, original_test])


# Group within groups
#1: Workclass
work = original['Workclass']
work = work.replace('Federal-gov', 'Government')
work = work.replace('Local-gov', 'Government')
work = work.replace('State-gov', 'Government')
work = work.replace('Self-emp-inc', 'Self-Employed')
work = work.replace('Self-emp-not-inc', 'Self-Employed')
work = work.replace('Never-worked', 'Other/Unknown')
work = work.replace('Without-pay', 'Other/Unknown')
work = work.replace(np.nan, 'Other/Unknown')

#2: Marital_status
marital = original['Martial Status']
marital = marital.replace('Married-AF-spouse', 'Married')
marital = marital.replace('Married-civ-spouse', 'Married')
marital = marital.replace('Married-spouse-absent', 'Married')
marital = marital.replace('Never-married', 'Single')

#3: Occupation
occupation = original['Occupation']
occupation = occupation.replace('Adm-clerical', 'White-Collar')
occupation = occupation.replace('Craft-repair', 'Blue-Collar')
occupation = occupation.replace('Exec-managerial', 'White-Collar')
occupation = occupation.replace('Farming-fishing', 'Blue-Collar')
occupation = occupation.replace('Handlers-cleaners', 'Blue-Collar')
occupation = occupation.replace('Machine-op-inspct', 'Blue-Collar')
occupation = occupation.replace('Transport-moving', 'Blue-Collar')
occupation = occupation.replace('Other-service', 'Service')
occupation = occupation.replace('Priv-house-serv', 'Service')
occupation = occupation.replace('Protective-serv', 'Service')
occupation = occupation.replace('Tech-support', 'Service')
occupation = occupation.replace('Prof-specialty', 'Professional')
occupation = occupation.replace('Unknown', 'Other/Unknown')
occupation = occupation.replace('Armed-Forces', 'Other/Unknown')
occupation = occupation.replace(np.nan, 'Other/Unknown')

#4: Income labels
labels = original['Target']
labels = labels.replace('<=50K', 0).replace('>50K', 1)
labels = labels.replace('<=50K.', 0).replace('>50K.', 1)

# Reassign columns
original['Target'] = labels
original['Workclass'] = work.astype('category')
original['Martial Status'] = marital
original['Occupation'] = occupation
original['Sex'] = original['Sex'].astype('category')

# For simplicity, remove redundant and unused columns 
# Dataframe summary
original.describe(include='all')

# %% [markdown]
Define the range of distributions and other hyper-parameters

# %% [code]
fair_constarint = ['single', 'min_cost', 'independence', 'fnr']
fair = 3

# Define true parameter settings
min_1_group1 = 0
max_1_group1 = 1
min_0_group1 = 0
max_0_group1 = 1
min_1_group0 = 0
max_1_group0 = 1
min_0_group0 = 0
max_0_group0 = 1

reference_quantile_0 = 0.6
reference_quantile_1 = 0.5
exploration_porb_group1 = 1
exploration_porb_group0 = 1
batchsize_init = 150
batchsize_additional = 2000

# Defining other parameters
TP_group1 = 0
FP_group1 = 0
FN_group1 = 0
TN_group1 = 0
TP_group0 = 0
FP_group0 = 0
FN_group0 = 0
TN_group0 = 0

TP_oracle_group1 = 0 
FP_oracle_group1 = 0
FN_oracle_group1 = 0
TN_oracle_group1 = 0
TP_oracle_group0 = 0 
FP_oracle_group0 = 0
FN_oracle_group0 = 0
TN_oracle_group0 = 0

# %% [markdown]
Data transformation and obtain true parameters from the entire dataset  

# %% [code]
# Data type transformation
def data_transform(df):
    """Normalize features."""
    binary_data = pd.get_dummies(df)
    feature_cols = binary_data[binary_data.columns[:-2]]
    scaler = preprocessing.StandardScaler()
    data = pd.DataFrame(scaler.fit_transform(feature_cols), columns=feature_cols.columns)
    return data

#data = original[["Age","Workclass","Education","Education-Num","Occupation",
#                 "Sex","Hours per week","Country"]]

data = original[["Age","Workclass","Education-Num","Sex"]]
data = data_transform(data)
X_train, X_test, y_train, y_test = train_test_split(data, labels, train_size = 0.9999, shuffle=True, random_state = 0)

classifier = LogisticRegression().fit(X_train, y_train)
prob = classifier.predict_proba(data)[:,1]
original["Prob"] = prob

# Split four groups data for true parameters mapping
grouphigh_label1 = original[(original["Target"]==1) & (original["Race"]=="White")]["Prob"]
grouphigh_label0 = original[(original["Target"]==0) & (original["Race"]=="White")]["Prob"]
grouplow_label1 = original[(original["Target"]==1) & (original["Race"]!="White")]["Prob"]
grouplow_label0 = original[(original["Target"]==0) & (original["Race"]!="White")]["Prob"]

# Reindex four groups data
grouphigh_label1.reset_index(inplace=True, drop=True)
grouphigh_label0.reset_index(inplace=True, drop=True)
grouplow_label1.reset_index(inplace=True, drop=True)
grouplow_label0.reset_index(inplace=True, drop=True)

a,b1_true_group1,c,d = beta.fit(grouphigh_label1,floc=min_1_group1,fscale=max_1_group1-min_1_group1)
a,b0_true_group1,c,d = beta.fit(grouphigh_label0,floc=min_0_group1,fscale=max_0_group1-min_0_group1)
a,b1_true_group0,c,d = beta.fit(grouplow_label1,floc=min_1_group0,fscale=max_1_group0-min_1_group0)
a,b0_true_group0,c,d = beta.fit(grouplow_label0,floc=min_0_group0,fscale=max_0_group0-min_0_group0)

x = np.arange(0.01,10,0.01)
def f(alpha):
    return abs(beta.cdf(np.quantile(grouphigh_label1,reference_quantile_1), alpha, b1_true_group1, loc=min_1_group1, scale=max_1_group1-min_1_group1) - reference_quantile_1)
a1_true_group1 = np.argmin(f(x))*0.01

def f(alpha):
    return abs(beta.cdf(np.quantile(grouphigh_label0,reference_quantile_0), alpha, b0_true_group1, loc=min_0_group1, scale=max_0_group1-min_0_group1) - reference_quantile_0)
a0_true_group1 = np.argmin(f(x))*0.01

def f(alpha):
    return abs(beta.cdf(np.quantile(grouplow_label1,reference_quantile_1), alpha, b1_true_group0, loc=min_1_group0, scale=max_1_group0-min_1_group0) - reference_quantile_1)
a1_true_group0 = np.argmin(f(x))*0.01

def f(alpha):
    return abs(beta.cdf(np.quantile(grouplow_label0,reference_quantile_0), alpha, b0_true_group0, loc=min_0_group0, scale=max_0_group0-min_0_group0) - reference_quantile_0)
a0_true_group0 = np.argmin(f(x))*0.01

print (a1_true_group1,b1_true_group1,a0_true_group1,b0_true_group1,
       a1_true_group0,b1_true_group0,a0_true_group0,b0_true_group0)

# %% [markdown]
Obtain initial parameters from initial training set

# %% [code]
# Select first (Initial_fit_portion) rows to find initial assumed distribution
Initial_fit_portion = 0.025
X_train, X_test, y_train, y_test = train_test_split(data, labels, train_size = Initial_fit_portion, shuffle=True, random_state = 0)

classifier = LogisticRegression().fit(X_train, y_train)
prob = classifier.predict_proba(data)[:,1]
original["Prob"] = prob
First_n_data = original.head(round(Initial_fit_portion*len(data)))
Initialhigh_label1 = First_n_data[(First_n_data["Target"]==1) & (First_n_data["Race"]=="White")]["Prob"]
Initialhigh_label0 = First_n_data[(First_n_data["Target"]==0) & (First_n_data["Race"]=="White")]["Prob"]
Initiallow_label1 = First_n_data[(First_n_data["Target"]==1) & (First_n_data["Race"]!="White")]["Prob"]
Initiallow_label0 = First_n_data[(First_n_data["Target"]==0) & (First_n_data["Race"]!="White")]["Prob"]

# Reindex
Initialhigh_label1.reset_index(inplace=True, drop=True)
Initialhigh_label0.reset_index(inplace=True, drop=True)
Initiallow_label1.reset_index(inplace=True, drop=True)
Initiallow_label0.reset_index(inplace=True, drop=True)

# Fix beta parameter
b1_init_group1 = b1_true_group1
b0_init_group1 = b0_true_group1
b1_init_group0 = b1_true_group0
b0_init_group0 = b0_true_group0

b1_group1 = b1_init_group1
b0_group1 = b0_init_group1
b1_group0 = b1_init_group0
b0_group0 = b0_init_group0

# Find initial alpha parameter by fixing beta value
def f(alpha):
    return abs(beta.cdf(np.quantile(Initialhigh_label1,reference_quantile_1), alpha, b1_true_group1, loc=min_1_group1, scale=max_1_group1-min_1_group1) - reference_quantile_1)
a1_init_group1 = np.argmin(f(x))*0.01

def f(alpha):
    return abs(beta.cdf(np.quantile(Initialhigh_label0,reference_quantile_0), alpha, b0_true_group1, loc=min_0_group1, scale=max_0_group1-min_0_group1) - reference_quantile_0)
a0_init_group1 = np.argmin(f(x))*0.01

def f(alpha):
    return abs(beta.cdf(np.quantile(Initiallow_label1,reference_quantile_1), alpha, b1_true_group0, loc=min_1_group0, scale=max_1_group0-min_1_group0) - reference_quantile_1)
a1_init_group0 = np.argmin(f(x))*0.01

def f(alpha):
    return abs(beta.cdf(np.quantile(Initiallow_label0,reference_quantile_0), alpha, b0_true_group0, loc=min_0_group0, scale=max_0_group0-min_0_group0) - reference_quantile_0)
a0_init_group0 = np.argmin(f(x))*0.01

a1_group1 = a1_init_group1
a0_group1 = a0_init_group1
a1_group0 = a1_init_group0
a0_group0 = a0_init_group0
print (a1_group1,b1_group1,a0_group1,b0_group1,
       a1_group0,b1_group0,a0_group0,b0_group0)

# %% [markdown]
Define cost matrix and build confusion matrix given threshold

# %% [code]
# Find the confusion matrix given threshold
def CM(Y_test,y_pred,threshold):
    # The Confusion Matrix given a threshold
    y_pred = np.where(y_pred>threshold,1,0)
    cm = pd.DataFrame(confusion_matrix(Y_test,y_pred))
    cm.rename(columns={0:'Pred_neg', 1:'Pred_pos'},
         index = {0:'Actual_neg',1:'Actual_pos'},inplace=True)
    cm['Total'] = cm['Pred_neg'] + cm['Pred_pos'] 
    rowsum = cm.sum()
    rowsum.name = 'Total'
    cm = cm.append(rowsum.transpose())
    
    # TP/TN/FP/FN/TPR/FPR
    P = cm['Total']['Actual_pos']
    N = cm['Total']['Actual_neg']
    TP = cm['Pred_pos']['Actual_pos']
    TN = cm['Pred_neg']['Actual_neg']
    FP = cm['Pred_pos']['Actual_neg']
    FN = cm['Pred_neg']['Actual_pos']
    TPR = np.round(TP/P,2)
    FPR = np.round(FP/N,2)
    return(cm, TPR, FPR)

# Define the cost matrix
COST_MATRIX = [[0, -3/6],
               [0,  3/6]]

# %% [markdown]
# Parameter Description
                                 
| Name        | Description |
| ----------- | ----------- |
| base_rates  | Base rate of label 1 per group       |
| base_rate   | The overall base rate label 1        |
| proportions | Fraction of individuals per group    |
| rocs| ROC per group |

# %% [markdown]
Find the initial fair classifier threshold and oracle fair classifier threshold from the initial data and entire true data respectively.

# %% [code]
# Find fair classifier for the inital training set

# Find the parameters proportions, base_rate and base_rates 
proportions = {'White': (len(Initialhigh_label1) + len(Initialhigh_label0))/(len(Initialhigh_label1) + len(Initialhigh_label0) + len(Initiallow_label1) + len(Initiallow_label0)), 
               'Non-White': 1 - (len(Initialhigh_label1) + len(Initialhigh_label0))/(len(Initialhigh_label1) + len(Initialhigh_label0) + len(Initiallow_label1) + len(Initiallow_label0))}
base_rate = (len(Initialhigh_label1) + len(Initiallow_label1))/(len(Initialhigh_label1) + len(Initialhigh_label0) + len(Initiallow_label1) + len(Initiallow_label0))
d = {'White': len(Initialhigh_label1)/(len(Initialhigh_label1) + len(Initialhigh_label0)), 'Non-White': len(Initiallow_label1)/(len(Initiallow_label1) + len(Initiallow_label0))}
base_rates = pd.Series(data = d, index = ['White','Non-White'])

# Find the ROC curve by construting confusion matrix 
yprob1 = First_n_data[First_n_data["Race"]=="White"]["Prob"]
yprob0 = First_n_data[First_n_data["Race"]!="White"]["Prob"]
  
TPR1 = []
FPR1 = []
threshold1 = []
for threshold in range(201,0,-1):
    cm, TPR, FPR = CM(First_n_data[First_n_data["Race"]=="White"]["Target"],yprob1,threshold/200)
    TPR1 = TPR1 + [TPR]
    FPR1 = FPR1 + [FPR]
    threshold1 = threshold1 + [threshold/200]
TPR1 = np.array(TPR1)
FPR1 = np.array(FPR1)
threshold1 = np.array(threshold1)

TPR0 = []
FPR0 = []
threshold0 = []
for threshold in range(201,0,-1):
    cm, TPR, FPR = CM(First_n_data[First_n_data["Race"]!="White"]["Target"],yprob0,threshold/200)
    TPR0 = TPR0 + [TPR]
    FPR0 = FPR0 + [FPR]
    threshold0 = threshold0 + [threshold/200]
TPR0 = np.array(TPR0)
FPR0 = np.array(FPR0)
threshold0 = np.array(threshold0)

# Find the parameter rocs 
rocs = {'White': (FPR1, TPR1, threshold1), 'Non-White': (FPR0, TPR0,threshold0)}

# Find the initial fairness classifier_1 and classifier_2 
thresholds_data = find_thresholds(rocs, proportions, base_rate, base_rates, COST_MATRIX)
if fair != 0:
    classifier_group1 = thresholds_data[fair_constarint[fair]][0]['White']
    classifier_group0 = thresholds_data[fair_constarint[fair]][0]['Non-White']
else: 
    classifier_group1 = thresholds_data[fair_constarint[fair]][0]
    classifier_group0 = thresholds_data[fair_constarint[fair]][0]
print (classifier_group1, classifier_group0)

# %% [code]
# Find oracle fair classifier for the entire set

# Find the parameters proportions, base_rate and base_rates 
proportions = {'White': (len(grouphigh_label1) + len(grouphigh_label0))/(len(grouphigh_label1) + len(grouphigh_label0) + len(grouplow_label1) + len(grouplow_label1)), 
               'Non-White': 1 - (len(grouphigh_label1) + len(grouphigh_label0))/(len(grouphigh_label1) + len(grouphigh_label0) + len(grouplow_label1) + len(grouplow_label1))}
base_rate = (len(grouphigh_label1) + len(grouplow_label1))/(len(grouphigh_label1) + len(grouphigh_label0) + len(grouplow_label1) + len(grouplow_label1))
d = {'White': len(grouphigh_label1)/(len(grouphigh_label1) + len(grouphigh_label0)), 'Non-White': len(grouplow_label1)/(len(grouplow_label1) + len(grouplow_label0))}
base_rates = pd.Series(data = d, index = ['White','Non-White'])

# Find the ROC curve by construting confusion matrix 
yprob1 = original[original["Race"]=="White"]["Prob"]
yprob0 = original[original["Race"]!="White"]["Prob"]

TPR1 = []
FPR1 = []
threshold1 = []
for threshold in range(201,0,-1):
    cm, TPR, FPR = CM(original[original["Race"]=="White"]["Target"],yprob1,threshold/200)
    TPR1 = TPR1 + [TPR]
    FPR1 = FPR1 + [FPR]
    threshold1 = threshold1 + [threshold/200]
TPR1 = np.array(TPR1)
FPR1 = np.array(FPR1)
threshold1 = np.array(threshold1)

TPR0 = []
FPR0 = []
threshold0 = []
for threshold in range(201,0,-1):
    cm, TPR, FPR = CM(original[original["Race"]!="White"]["Target"],yprob0,threshold/200)
    TPR0 = TPR0 + [TPR]
    FPR0 = FPR0 + [FPR]
    threshold0 = threshold0 + [threshold/200]
TPR0 = np.array(TPR0)
FPR0 = np.array(FPR0)
threshold0 = np.array(threshold0)

# Find the parameter rocs 
rocs = {'White': (FPR1, TPR1, threshold1), 'Non-White': (FPR0, TPR0,threshold0)}

# Find the initial fairness classifier_1 and classifier_2 
thresholds_data = find_thresholds(rocs, proportions, base_rate, base_rates, COST_MATRIX)
if fair != 0:
    classifier_oracle_value_1 = thresholds_data[fair_constarint[fair]][0]['White']
    classifier_oracle_value_0 = thresholds_data[fair_constarint[fair]][0]['Non-White']
else: 
    classifier_oracle_value_1 = thresholds_data[fair_constarint[fair]][0]
    classifier_oracle_value_0 = thresholds_data[fair_constarint[fair]][0]
print (classifier_oracle_value_1, classifier_oracle_value_0)

# %% [markdown]
Find out the corresponding LB and UB for each group

# %% [code]
# Find the LB_1 and UB_1 with fair classifier(Using alpha = 60 for label 0 and median for label 1)
temp = 2*beta.cdf(beta.ppf(reference_quantile_0,a0_group1,b0_group1,loc=min_0_group1, scale=max_0_group1-min_0_group1),a0_group1,b0_group1,loc=min_0_group1, scale=max_0_group1-min_0_group1) -\
            beta.cdf(classifier_group1,a0_group1,b0_group1,loc=min_0_group1, scale=max_0_group1-min_0_group1)
LB_group1 = max(min_0_group1, float(beta.ppf(temp,a0_group1,b0_group1,loc=min_0_group1, scale=max_0_group1-min_0_group1)))

temp = 2*beta.cdf(beta.ppf(reference_quantile_1,a1_group1,b1_group1,loc=min_1_group1, scale=max_1_group1-min_1_group1),a1_group1,b1_group1,loc=min_1_group1, scale=max_1_group1-min_1_group1) -\
            beta.cdf(LB_group1,a1_group1,b1_group1,loc=min_1_group1, scale=max_1_group1-min_1_group1)
UB_group1 = min(max_1_group1, float(beta.ppf(temp,a1_group1,b1_group1,loc=min_1_group1, scale=max_1_group1-min_1_group1)))

# Find the LB_0 and UB_0 with fair classifier(Using alpha = 60 for label 0 and median for label 1)
temp = 2*beta.cdf(beta.ppf(reference_quantile_0,a0_group0,b0_group0,loc=min_0_group0, scale=max_0_group0-min_0_group0),a0_group0,b0_group0,loc=min_0_group0, scale=max_0_group0-min_0_group0) -\
            beta.cdf(classifier_group0,a0_group0,b0_group0,loc=min_0_group0, scale=max_0_group0-min_0_group0)
LB_group0 = max(min_0_group0, float(beta.ppf(temp,a0_group0,b0_group0,loc=min_0_group0, scale=max_0_group0-min_0_group0)))

temp = 2*beta.cdf(beta.ppf(reference_quantile_1,a1_group0,b1_group0,loc=min_1_group0, scale=max_1_group0-min_1_group0),a1_group0,b1_group0,loc=min_1_group0, scale=max_1_group0-min_1_group0) -\
            beta.cdf(LB_group0,a1_group0,b1_group0,loc=min_1_group0, scale=max_1_group0-min_1_group0)
UB_group0 = min(max_1_group0, float(beta.ppf(temp,a1_group0,b1_group0,loc=min_1_group0, scale=max_1_group0-min_1_group0)))
print (LB_group1, UB_group1, LB_group0, UB_group0)

# %% [markdown]
Record initial data and assign all the rest of data as incoming data

# %% [code]
from sklearn.utils import shuffle
data_1_group1 = Initialhigh_label1
data_0_group1 = Initialhigh_label0
data_1_group0 = Initiallow_label1
data_0_group0 = Initiallow_label0

Rest_data = original.tail(round((1-Initial_fit_portion)*len(data)))[["Prob","Target","Race"]]
Rest_data.reset_index(inplace=True, drop=True)

generating_samples_group1 = 30000
generating_samples_group0 = 30000
true_pop_prob_group1 = 0.5
true_pop_prob_group0 = 0.5
label1_group1 = beta.rvs(a1_true_group1, b1_true_group1, loc=min_1_group1, scale=max_1_group1-min_1_group1, 
                  size=int(generating_samples_group1*(1-true_pop_prob_group1)))
label0_group1 = beta.rvs(a0_true_group1, b0_true_group1, loc=min_0_group1, scale=max_0_group1-min_0_group1, 
                  size=int(generating_samples_group1*true_pop_prob_group1))
label1_group0 = beta.rvs(a1_true_group0, b1_true_group0, loc=min_1_group0, scale=max_1_group0-min_1_group0, 
                  size=int(generating_samples_group0*(1-true_pop_prob_group0)))
label0_group0 = beta.rvs(a0_true_group0, b0_true_group0, loc=min_0_group0, scale=max_0_group0-min_0_group0, 
                  size=int(generating_samples_group0*true_pop_prob_group0))
additional_data = pd.DataFrame(columns = ["Prob","Target","Race"])
additional_data['Prob'] = np.hstack((label1_group1, label0_group1, label1_group0, label0_group0))
additional_data['Target'] = np.hstack((np.ones(len(label1_group1)), np.zeros(len(label0_group1)), np.ones(len(label1_group0)), np.zeros(len(label0_group0))))
additional_data['Race'] = np.hstack((['White'] * (len(label1_group1)+len(label0_group1)), ['!White'] * (len(label1_group0)+len(label0_group0)) ))
additional_data = shuffle(additional_data)
# Resign the index 
additional_data.reset_index(inplace=True, drop=True)

info = pd.DataFrame(columns = ['True Label','Values','Decision','RP_1_group1','RP_0_group1',
                                      'Classifier_group1','Explore_Prob_group1','RP_1_group0','RP_0_group0',
                                      'Classifier_group0','Explore_Prob_group0','Alpha_1_group1','Alpha_0_group1',
                                       'Alpha_1_group0','Alpha_0_group0','Regret','Race'])
info[["Values","True Label","Race"]] = pd.concat([Rest_data, additional_data])
info.reset_index(inplace=True, drop=True)

# %% [code]
i = 0
# Create loop for updating
while (i <= len(info)-1):
    
    if i<= (len(grouphigh_label1) + len(grouphigh_label0) + len(grouplow_label1) + len(grouplow_label1)):
        batchsize = batchsize_init
    else: 
        batchsize = batchsize_additional
        
    data_1_trun_group1 = []
    data_0_trun_group1 = []
    data_1_trun_group0 = []
    data_0_trun_group0 = []
    
    # find quantile of reference point including label 0 tail for advantage group
    portion_right0_group1 = (beta.sf(beta.ppf(reference_quantile_0,a0_group1,b0_group1,loc=min_0_group1, scale=max_0_group1-min_0_group1),
                                    a0_group1,b0_group1,loc=min_0_group1, scale=max_0_group1-min_0_group1)
                     /beta.sf(LB_group1,a0_group1,b0_group1,loc=min_0_group1, scale=max_0_group1-min_0_group1))
    portion_left0_group1 = 1 - portion_right0_group1
    
    portion_right1_group1 = (beta.sf(beta.ppf(reference_quantile_1,a1_group1,b1_group1,loc=min_1_group1, scale=max_1_group1-min_1_group1),
                                    a1_group1,b1_group1,loc=min_1_group1, scale=max_1_group1-min_1_group1)
                     /beta.sf(LB_group1,a1_group1,b1_group1,loc=min_1_group1, scale=max_1_group1-min_1_group1))
    portion_left1_group1 = 1 - portion_right1_group1
    
    # find quantile of reference point including label 0 tail for disadvantage group
    portion_right0_group0 = (beta.sf(beta.ppf(reference_quantile_0,a0_group0,b0_group0,loc=min_0_group0, scale=max_0_group0-min_0_group0),
                                    a0_group0,b0_group0,loc=min_0_group0, scale=max_0_group0-min_0_group0)
                     /beta.sf(LB_group0,a0_group0,b0_group0,loc=min_0_group0, scale=max_0_group0-min_0_group0))
    portion_left0_group0 = 1 - portion_right0_group0
    
    portion_right1_group0 = (beta.sf(beta.ppf(reference_quantile_1,a1_group0,b1_group0,loc=min_1_group0, scale=max_1_group0-min_1_group0),
                                    a1_group0,b1_group0,loc=min_1_group0, scale=max_1_group0-min_1_group0)
                     /beta.sf(LB_group0,a1_group0,b1_group0,loc=min_1_group0, scale=max_1_group0-min_1_group0))
    portion_left1_group0 = 1 - portion_right1_group0
    
    k1_group1 = len(data_1_trun_group1)
    k0_group1 = len(data_0_trun_group1)
    k1_group0 = len(data_1_trun_group0)
    k0_group0 = len(data_0_trun_group0)
    #loop into each batch
    while ((min(k1_group1, k0_group1, k1_group0, k0_group0) <= batchsize) & (i <= len(info)-1)):
        
        if info.loc[i,'Race'] == "White":
        
            # Make decisions
            if (info.loc[i,'Values'] >= classifier_group1) & (info.loc[i,'Values']<=UB_group1):
                info.loc[i,'Decision'] = 1
            elif (info.loc[i,'Values'] < classifier_group1) & (info.loc[i,'Values']>=LB_group1) & (np.random.uniform(size=1)<=exploration_porb_group1):
                info.loc[i,'Decision'] = 1
            elif (info.loc[i,'Values'] >= classifier_group1) & (info.loc[i,'Values']>UB_group1):
                info.loc[i,'Decision'] = 2
            elif (info.loc[i,'Values'] < classifier_group1) & (info.loc[i,'Values']<LB_group1):
                info.loc[i,'Decision'] = 3
            else:
                info.loc[i,'Decision'] = 0  

            # Record confusion matrix
            if (info.loc[i,'True Label']==1) & ((info.loc[i,'Decision']==1) or (info.loc[i,'Decision']==2)):
                TP_group1 += 1
            elif (info.loc[i,'True Label']==1) & ((info.loc[i,'Decision']==0) or (info.loc[i,'Decision']==3)):
                FN_group1 += 1
            elif (info.loc[i,'True Label']==0) & ((info.loc[i,'Decision']==0) or (info.loc[i,'Decision']==3)):
                TN_group1 += 1
            else:
                FP_group1 += 1

            # Record oracle matrix
            if (info.loc[i,'Values'] >= classifier_oracle_value_1) & (info.loc[i,'True Label']==1):
                TP_oracle_group1 += 1
            elif (info.loc[i,'Values'] >= classifier_oracle_value_1) & (info.loc[i,'True Label']==0):
                FP_oracle_group1 += 1
            elif (info.loc[i,'Values'] < classifier_oracle_value_1) & (info.loc[i,'True Label']==1):
                FN_oracle_group1 += 1
            else:
                TN_oracle_group1 += 1


            # Record label 1 information for updating
            if (info.loc[i,'True Label']==1) & ((info.loc[i,'Decision']==1) or (info.loc[i,'Decision']==2)):
                data_1_group1 = np.append(data_1_group1, info.loc[i,'Values'])
                if (((info.loc[i,'Values'] < classifier_group1) & (info.loc[i,'Decision']==1)) 
                   or ((info.loc[i,'Values'] >= classifier_group1) & (info.loc[i,'Decision']==1) & (np.random.uniform(size=1)<=exploration_porb_group1))):
                    data_1_trun_group1 = np.append(data_1_trun_group1, info.loc[i,'Values'])
            else:
                data_1_group1 = data_1_group1 
                data_1_trun_group1 = data_1_trun_group1


            # Record label 0 information for updating
            if (info.loc[i,'True Label']==0) & ((info.loc[i,'Decision']==1) or (info.loc[i,'Decision']==2)):
                data_0_group1 = np.append(data_0_group1, info.loc[i,'Values'])
                if (((info.loc[i,'Values'] < classifier_group1) & (info.loc[i,'Decision']==1)) 
                    or ((info.loc[i,'Values'] >= classifier_group1) & (np.random.uniform(size=1)<=exploration_porb_group1))):
                    data_0_trun_group1 = np.append(data_0_trun_group1, info.loc[i,'Values'])
            else:
                data_0_group1 = data_0_group1 
                data_0_trun_group1 = data_0_trun_group1
       
        else: # for non-white group
            
            # Make decisions
            if (info.loc[i,'Values'] >= classifier_group0) & (info.loc[i,'Values']<=UB_group0):
                info.loc[i,'Decision'] = 1
            elif (info.loc[i,'Values'] < classifier_group0) & (info.loc[i,'Values']>=LB_group0) & (np.random.uniform(size=1)<=exploration_porb_group0):
                info.loc[i,'Decision'] = 1
            elif (info.loc[i,'Values'] >= classifier_group0) & (info.loc[i,'Values']>UB_group0):
                info.loc[i,'Decision'] = 2
            elif (info.loc[i,'Values'] < classifier_group0) & (info.loc[i,'Values']<LB_group0):
                info.loc[i,'Decision'] = 3
            else:
                info.loc[i,'Decision'] = 0  

            # Record confusion matrix
            if (info.loc[i,'True Label']==1) & ((info.loc[i,'Decision']==1) or (info.loc[i,'Decision']==2)):
                TP_group0 += 1
            elif (info.loc[i,'True Label']==1) & ((info.loc[i,'Decision']==0) or (info.loc[i,'Decision']==3)):
                FN_group0 += 1
            elif (info.loc[i,'True Label']==0) & ((info.loc[i,'Decision']==0) or (info.loc[i,'Decision']==3)):
                TN_group0 += 1
            else:
                FP_group0 += 1

            # Record oracle matrix
            if (info.loc[i,'Values'] >= classifier_oracle_value_0) & (info.loc[i,'True Label']==1):
                TP_oracle_group0 += 1
            elif (info.loc[i,'Values'] >= classifier_oracle_value_0) & (info.loc[i,'True Label']==0):
                FP_oracle_group0 += 1
            elif (info.loc[i,'Values'] < classifier_oracle_value_0) & (info.loc[i,'True Label']==1):
                FN_oracle_group0 += 1
            else:
                TN_oracle_group0 += 1


            # Record label 1 information for updating
            if (info.loc[i,'True Label']==1) & ((info.loc[i,'Decision']==1) or (info.loc[i,'Decision']==2)):
                data_1_group0 = np.append(data_1_group0, info.loc[i,'Values'])
                if (((info.loc[i,'Values'] < classifier_group0) & (info.loc[i,'Decision']==1)) 
                   or ((info.loc[i,'Values'] >= classifier_group0) & (info.loc[i,'Decision']==1) & (np.random.uniform(size=1)<=exploration_porb_group0))):
                    data_1_trun_group0 = np.append(data_1_trun_group0, info.loc[i,'Values'])
            else:
                data_1_group0 = data_1_group0 
                data_1_trun_group0 = data_1_trun_group0


            # Record label 0 information for updating
            if (info.loc[i,'True Label']==0) & ((info.loc[i,'Decision']==1) or (info.loc[i,'Decision']==2)):
                data_0_group0 = np.append(data_0_group0, info.loc[i,'Values'])
                if (((info.loc[i,'Values'] < classifier_group0) & (info.loc[i,'Decision']==1)) 
                    or ((info.loc[i,'Values'] >= classifier_group0) & (np.random.uniform(size=1)<=exploration_porb_group0))):
                    data_0_trun_group0 = np.append(data_0_trun_group0, info.loc[i,'Values'])
            else:
                data_0_group0 = data_0_group0 
                data_0_trun_group0 = data_0_trun_group0
            
        k1_group1 = len(data_1_trun_group1)
        k0_group1 = len(data_0_trun_group1)
        k1_group0 = len(data_1_trun_group0)
        k0_group0 = len(data_0_trun_group0)
        i = i + 1
    
    print (k1_group1, k0_group1, k1_group0, k0_group0)
    # Record new mean value/RP and classifier
    info.loc[i-1,'RP_1_group1'] = np.quantile(data_1_trun_group1, portion_left1_group1)  #np.median(data_1_trun_group1) 
    info.loc[i-1,'RP_0_group1'] =  np.quantile(data_0_trun_group1, portion_left0_group1) 
    info.loc[i-1,'Classifier_group1'] = classifier_group1
    info.loc[i-1,'Regret'] = (FP_group1 + FN_group1)-(FP_oracle_group1 + FN_oracle_group1)
    info.loc[i-1,'Explore_Prob_group1'] = exploration_porb_group1
    
    info.loc[i-1,'RP_1_group0'] = np.quantile(data_1_trun_group0, portion_left1_group0)   #np.median(data_1_trun_group0)  
    info.loc[i-1,'RP_0_group0'] =  np.quantile(data_0_trun_group0, portion_left0_group0) 
    info.loc[i-1,'Classifier_group0'] = classifier_group0
    info.loc[i-1,'Explore_Prob_group0'] = exploration_porb_group0
    
    x = np.arange(0.01,10,0.01)
    # Reassign new values to parameters
    def f(alpha):
        return abs(beta.cdf(info.loc[i-1,'RP_1_group1'], alpha, b1_group1, loc=min_1_group1, scale=max_1_group1-min_1_group1) - reference_quantile_1)
    info.loc[i-1,'Alpha_1_group1'] = np.argmin(f(x))*0.01
    
    def f(alpha):
        return abs(beta.cdf(info.loc[i-1,'RP_0_group1'], alpha, b0_group1, loc=min_0_group1, scale=max_0_group1-min_0_group1) - reference_quantile_0)
    info.loc[i-1,'Alpha_0_group1'] = np.argmin(f(x))*0.01
    
    def f(alpha):
        return abs(beta.cdf(info.loc[i-1,'RP_1_group0'], alpha, b1_group0, loc=min_1_group0, scale=max_1_group0-min_1_group0) - reference_quantile_1)
    info.loc[i-1,'Alpha_1_group0'] = np.argmin(f(x))*0.01
    
    def f(alpha):
        return abs(beta.cdf(info.loc[i-1,'RP_0_group0'], alpha, b0_group0, loc=min_0_group0, scale=max_0_group0-min_0_group0) - reference_quantile_0)
    info.loc[i-1,'Alpha_0_group0'] = np.argmin(f(x))*0.01
    
    a1_group1 = info.loc[i-1,'Alpha_1_group1']
    a0_group1 = info.loc[i-1,'Alpha_0_group1']
    a1_group0 = info.loc[i-1,'Alpha_1_group0']
    a0_group0 = info.loc[i-1,'Alpha_0_group0']
    
    
    
    # Update fair classifiers, UB and LB
    # Find the parameters proportions, base_rate and base_rates 
    proportions = {'White': (len(data_1_group1) + len(data_0_group1))/(len(data_1_group1) + len(data_0_group1) + len(data_1_group0) + len(data_0_group0)), 
                   'Non-White': 1 - (len(data_1_group1) + len(data_0_group1))/(len(data_1_group1) + len(data_0_group1) + len(data_1_group0) + len(data_0_group0))}
    base_rate = (len(data_1_group1) + len(data_1_group0))/(len(data_1_group1) + len(data_0_group1) + len(data_1_group0) + len(data_0_group0))
    d = {'White': len(data_1_group1)/(len(data_1_group1) + len(data_0_group1)), 'Non-White': len(data_1_group0)/(len(data_1_group0) + len(data_0_group0))}
    base_rates = pd.Series(data = d, index = ['White','Non-White'])

    # Find the ROC curve by construting confusion matrix 
    yprob1 = np.append(data_1_group1, data_0_group1)
    yprob0 = np.append(data_1_group0, data_0_group0)

    TPR1 = []
    FPR1 = []
    threshold1 = []
    for threshold in range(201,0,-1):
        cm, TPR, FPR = CM(np.append(np.ones(len(data_1_group1)),np.zeros(len(data_0_group1))),yprob1,threshold/200)
        TPR1 = TPR1 + [TPR]
        FPR1 = FPR1 + [FPR]
        threshold1 = threshold1 + [threshold/200]
    TPR1 = np.array(TPR1)
    FPR1 = np.array(FPR1)
    threshold1 = np.array(threshold1)

    TPR0 = []
    FPR0 = []
    threshold0 = []
    for threshold in range(201,0,-1):
        cm, TPR, FPR = CM(np.append(np.ones(len(data_1_group0)),np.zeros(len(data_0_group0))),yprob0,threshold/200)
        TPR0 = TPR0 + [TPR]
        FPR0 = FPR0 + [FPR]
        threshold0 = threshold0 + [threshold/200]
    TPR0 = np.array(TPR0)
    FPR0 = np.array(FPR0)
    threshold0 = np.array(threshold0)

    # Find the parameter rocs 
    rocs = {'White': (FPR1, TPR1, threshold1), 'Non-White': (FPR0, TPR0,threshold0)}

    # Find the initial fairness classifier_1 and classifier_0 
    thresholds_data = find_thresholds(rocs, proportions, base_rate, base_rates, COST_MATRIX)
    if fair != 0:
        classifier_group1 = thresholds_data[fair_constarint[fair]][0]['White']
        classifier_group0 = thresholds_data[fair_constarint[fair]][0]['Non-White']
    else: 
        classifier_group1 = thresholds_data[fair_constarint[fair]][0]
        classifier_group0 = thresholds_data[fair_constarint[fair]][0]

    temp = 2*beta.cdf(beta.ppf(reference_quantile_0,a0_group1,b0_group1,loc=min_0_group1, scale=max_0_group1-min_0_group1),a0_group1,b0_group1,loc=min_0_group1, scale=max_0_group1-min_0_group1) -\
            beta.cdf(classifier_group1,a0_group1,b0_group1,loc=min_0_group1, scale=max_0_group1-min_0_group1)
    LB_group1 = max(min_0_group1, float(beta.ppf(temp,a0_group1,b0_group1,loc=min_0_group1, scale=max_0_group1-min_0_group1)))

    temp = 2*beta.cdf(beta.ppf(reference_quantile_1,a1_group1,b1_group1,loc=min_1_group1, scale=max_1_group1-min_1_group1),a1_group1,b1_group1,loc=min_1_group1, scale=max_1_group1-min_1_group1) -\
            beta.cdf(LB_group1,a1_group1,b1_group1,loc=min_1_group1, scale=max_1_group1-min_1_group1)
    UB_group1 = min(max_1_group1, float(beta.ppf(temp,a1_group1,b1_group1,loc=min_1_group1, scale=max_1_group1-min_1_group1)))
    

    temp = 2*beta.cdf(beta.ppf(reference_quantile_0,a0_group0,b0_group0,loc=min_0_group0, scale=max_0_group0-min_0_group0),a0_group0,b0_group0,loc=min_0_group0, scale=max_0_group0-min_0_group0) -\
            beta.cdf(classifier_group0,a0_group0,b0_group0,loc=min_0_group0, scale=max_0_group0-min_0_group0)
    LB_group0 = max(min_0_group0, float(beta.ppf(temp,a0_group0,b0_group0,loc=min_0_group0, scale=max_0_group0-min_0_group0)))

    temp = 2*beta.cdf(beta.ppf(reference_quantile_1,a1_group0,b1_group0,loc=min_1_group0, scale=max_1_group0-min_1_group0),a1_group0,b1_group0,loc=min_1_group0, scale=max_1_group0-min_1_group0) -\
            beta.cdf(LB_group0,a1_group0,b1_group0,loc=min_1_group0, scale=max_1_group0-min_1_group0)
    UB_group0 = min(max_1_group0, float(beta.ppf(temp,a1_group0,b1_group0,loc=min_1_group0, scale=max_1_group0-min_1_group0)))
    
    # Update exploration probability for advantage group
    theoretical_value_group1 = beta.sf(classifier_group1,a0_group1,b0_group1,loc=min_0_group1, scale=max_0_group1-min_0_group1) \
                                /beta.sf(LB_group1,a0_group1,b0_group1,loc=min_0_group1, scale=max_0_group1-min_0_group1)
    experiment_value_group1 = len(data_0_trun_group1[data_0_trun_group1>=classifier_group1])/len(data_0_trun_group1[data_0_trun_group1>=LB_group1])
    diff_group1 = abs(theoretical_value_group1 - experiment_value_group1)
     
    exploration_porb_group1 = 1 - 0.1*(i//(len(info)/10))
    # Update exploration probability for disadvantage group
    theoretical_value_group0 = beta.sf(classifier_group0,a0_group0,b0_group0,loc=min_0_group0, scale=max_0_group0-min_0_group0) \
                                /beta.sf(LB_group0,a0_group0,b0_group0,loc=min_0_group0, scale=max_0_group0-min_0_group0)
    experiment_value_group0 = len(data_0_trun_group0[data_0_trun_group0>=classifier_group0])/len(data_0_trun_group0[data_0_trun_group0>=LB_group0])
    diff_group0 = abs(theoretical_value_group0 - experiment_value_group0)
    exploration_porb_group0 = 1 - 0.1*(i//(len(info)/10))

# %% [markdown]
Add initial information to thhe DataFrame

# %% [code]
initial_information = []
initial_information.insert(0, {'True Label':'NA','Values':'NA','Decision':'NA','RP_1_group1':'NA','RP_0_group1':'NA',
                                      'Classifier_group1':'NA','Explore_Prob_group1':1,'RP_1_group0':'NA','RP_0_group0':'NA',
                                      'Classifier_group0':'NA','Explore_Prob_group0':1, 'Alpha_1_group1': a1_init_group1,
                                      'Alpha_0_group1':a0_init_group1,'Alpha_1_group0':a1_init_group0,
                                      'Alpha_0_group0': a0_init_group0, 'Regret':0, 'Race':'NA'})
info = pd.concat([pd.DataFrame(initial_information), info], ignore_index=True)


# %% [markdown]
Performance visualization

# %% [code]
plt.plot(info['Alpha_1_group1'].dropna().index[:len(info['Alpha_1_group1'].dropna())-3],info['Alpha_1_group1'].dropna()[:len(info['Alpha_1_group1'].dropna())-3],
         lw=2,color='red',marker='^',ms=10, markevery=1,markerfacecolor='red')
plt.plot(info['Alpha_0_group1'].dropna().index[:len(info['Alpha_1_group1'].dropna())-3],info['Alpha_0_group1'].dropna()[:len(info['Alpha_0_group1'].dropna())-3],
         lw=2,color='green', marker='o',ms=10, markevery=1,markerfacecolor='green')
plt.legend(['Alpha_1_groupA','Alpha_0_groupA'],fontsize=15)
#plt.title("Initial: $B^1_a$(1.83,3.32)/$B^0_a$(1.22,4.99); True: $B^1_a$(1.94,3.32)/$B^0_a$(1.13,4.99)",fontsize=15)
plt.xlabel('Number of Samples Observed', fontsize=15)
plt.ylabel('Alpha Estimates for Group A', fontsize=15)
plt.show()

plt.plot(info['Alpha_1_group0'].dropna().index[:len(info['Alpha_1_group1'].dropna())-3],info['Alpha_1_group0'].dropna()[:len(info['Alpha_1_group0'].dropna())-3],
         lw=2,color='red',marker='^',ms=10, markevery=1,markerfacecolor='red')
plt.plot(info['Alpha_0_group0'].dropna().index[:len(info['Alpha_1_group1'].dropna())-3],info['Alpha_0_group0'].dropna()[:len(info['Alpha_0_group0'].dropna())-3],
         lw=2,color='green', marker='o',ms=10, markevery=1,markerfacecolor='green')
plt.legend(['Alpha_1_groupB','Alpha_0_groupB'],fontsize=15)
#plt.title("Initial: $B^1_b$(1.74,3.53)/$B^0_b$(1.28,6.10); True: $B^1_b$(1.97,3.53)/$B^0_b$(1.19,6.10)",fontsize=15)
plt.xlabel('Number of Samples Observed', fontsize=15)
plt.ylabel('Alpha Estimates for Group B', fontsize=15)
plt.show()


plt.plot(info['Alpha_1_group1'].dropna().index[:len(info['Alpha_1_group1'].dropna())-1],info['Alpha_1_group1'].dropna()[:len(info['Alpha_1_group1'].dropna())-1],
         lw=2,color='red',marker='^',ms=10, markevery=1,markerfacecolor='red')
plt.plot(info['Alpha_0_group1'].dropna().index[:len(info['Alpha_1_group1'].dropna())-1],info['Alpha_0_group1'].dropna()[:len(info['Alpha_0_group1'].dropna())-1],
         lw=2,color='green', marker='o',ms=10, markevery=1,markerfacecolor='green')
plt.legend(['Alpha_1_groupA','Alpha_0_groupA'],fontsize=15)
#plt.title("Initial: $B^1_a$(1.83,3.32)/$B^0_a$(1.22,4.99); True: $B^1_a$(1.94,3.32)/$B^0_a$(1.13,4.99)",fontsize=15)
plt.xlabel('Number of Samples Observed', fontsize=15)
plt.ylabel('Alpha Estimates for Group A', fontsize=15)
plt.show()

plt.plot(info['Alpha_1_group0'].dropna().index[:len(info['Alpha_1_group1'].dropna())-1],info['Alpha_1_group0'].dropna()[:len(info['Alpha_1_group0'].dropna())-1],
         lw=2,color='red',marker='^',ms=10, markevery=1,markerfacecolor='red')
plt.plot(info['Alpha_0_group0'].dropna().index[:len(info['Alpha_1_group1'].dropna())-1],info['Alpha_0_group0'].dropna()[:len(info['Alpha_0_group0'].dropna())-1],
         lw=2,color='green', marker='o',ms=10, markevery=1,markerfacecolor='green')
plt.legend(['Alpha_1_groupB','Alpha_0_groupB'],fontsize=15)
#plt.title("Initial: $B^1_b$(1.74,3.53)/$B^0_b$(1.28,6.10); True: $B^1_b$(1.97,3.53)/$B^0_b$(1.19,6.10)",fontsize=15)
plt.xlabel('Number of Samples Observed', fontsize=15)
plt.ylabel('Alpha Estimates for Group B', fontsize=15)
plt.show()

plt.plot(np.arange(1,len(info['Alpha_1_group1'].dropna())+1,1),info['Alpha_1_group1'].dropna()[:len(info['Alpha_1_group1'].dropna())]-a1_true_group1,
         lw=4,color='red',marker='^',ms=14, markevery=40,markerfacecolor='red')
plt.plot(np.arange(1,len(info['Alpha_0_group1'].dropna())+1,1),info['Alpha_0_group1'].dropna()[:len(info['Alpha_0_group1'].dropna())]-a0_true_group1,
         lw=4,color='green', marker='o',ms=14, markevery=40,markerfacecolor='green')
plt.plot(np.arange(1,len(info['Alpha_1_group0'].dropna())+1,1),info['Alpha_1_group0'].dropna()[:len(info['Alpha_1_group0'].dropna())]-a1_true_group0,
         lw=4,color='blue',marker='^',ms=14, markevery=40,markerfacecolor='blue')
plt.plot(np.arange(1,len(info['Alpha_0_group0'].dropna())+1,1),info['Alpha_0_group0'].dropna()[:len(info['Alpha_0_group0'].dropna())]-a0_true_group0,
         lw=4,color='black', marker='o',ms=14, markevery=40,markerfacecolor='black')
plt.legend(['Alpha_1_groupA','Alpha_0_groupA','Alpha_1_groupB','Alpha_0_groupB'],fontsize=20)
plt.xlabel('Number of Updates', fontsize=20)
plt.ylabel('Differences w.r.t True ', fontsize=20)
plt.show()


# %% [code]
plt.plot(info['Explore_Prob_group1'].dropna().index[:len(info['Explore_Prob_group1'].dropna())],info['Explore_Prob_group1'].dropna()[:len(info['Explore_Prob_group1'].dropna())],
         lw=2,color='red',marker='^',ms=10, markevery=1,markerfacecolor='red')
plt.plot(info['Explore_Prob_group0'].dropna().index[:len(info['Explore_Prob_group0'].dropna())],info['Explore_Prob_group0'].dropna()[:len(info['Explore_Prob_group0'].dropna())],
         lw=2,color='green', marker='o',ms=10, markevery=1,markerfacecolor='green')
plt.legend(['Explore_Prob_group1','Explore_Prob_group0'],fontsize=15)
plt.xlabel('Number of Samples Observed', fontsize=20)
plt.ylabel('Alpha Estimates for GroupB', fontsize=20)
plt.show()

plt.plot(info['Regret'].dropna().index[:len(info['Regret'].dropna())],info['Regret'].dropna()[:len(info['Regret'].dropna())],
         lw=2,color='red',marker='^',ms=10, markevery=2,markerfacecolor='red')
plt.legend(['Regret'],fontsize=15)
plt.xlabel('Number of Samples Observed', fontsize=20)
plt.ylabel('Alpha Estimates for GroupB', fontsize=20)
plt.show()

# %% [code]
data = [info['Alpha_1_group1'].dropna(), info['Alpha_0_group1'].dropna(),info['Alpha_1_group0'].dropna(),info['Alpha_0_group0'].dropna()]
df = pd.DataFrame(data=data)
df['True'] = [a1_true_group1,a0_true_group1,a1_true_group0,a0_true_group0]
df.insert(0,'Initial',[a1_init_group1,a0_init_group1,a1_init_group0,a0_init_group0])
df.insert(0,'Total',[len(grouphigh_label1),len(grouphigh_label0),len(grouplow_label1),len(grouplow_label0)])
print (df)

# %% [code]
x1 = np.array([0, 10000, 15000, 20000, 30000, 40000, 50000, 65000, 100000])
data_1 = np.array([1.83, 1.83, 1.83, 1.83, 1.83])
mean_1 = np.mean(data_1)
sd_1 = np.std(data_1, ddof=1) 

data_2 = np.array([1.78, 1.78, 1.78, 1.78, 1.78])
mean_2 = np.mean(data_2)
sd_2 = np.std(data_2, ddof=1) 

data_3 = np.array([1.83, 1.83, 1.83, 1.83, 1.83])
mean_3 = np.mean(data_3)
sd_3 = np.std(data_3, ddof=1) 

data_4 = np.array([1.78, 1.8, 1.78, 1.76, 1.78])
mean_4 = np.mean(data_4)
sd_4 = np.std(data_4, ddof=1) 

data_5 = np.array([1.84, 1.82, 1.83, 1.84, 1.84])
mean_5 = np.mean(data_5)
sd_5 = np.std(data_5, ddof=1) 

data_6 = np.array([1.83, 1.86, 1.83, 1.83, 1.78])
mean_6 = np.mean(data_6)
sd_6 = np.std(data_6, ddof=1) 

data_7 = np.array([1.87, 1.87, 1.83, 1.86, 1.84])
mean_7 = np.mean(data_7)
sd_7 = np.std(data_7, ddof=1) 

data_8 = np.array([1.91, 1.89, 1.87, 1.91, 1.89])
mean_8 = np.mean(data_8)
sd_8 = np.std(data_8, ddof=1) 

data_9 = np.array([1.93, 1.95, 1.95, 1.96, 1.89])
mean_9 = np.mean(data_9)
sd_9 = np.std(data_9, ddof=1) 


bdata_1 = np.array([1.22, 1.22, 1.22, 1.22, 1.22])
bmean_1 = np.mean(bdata_1)
bsd_1 = np.std(bdata_1, ddof=1) 

bdata_2 = np.array([1.08, 1.08, 1.08, 1.08, 1.08])
bmean_2 = np.mean(bdata_2)
bsd_2 = np.std(bdata_2, ddof=1) 

bdata_3 = np.array([1.05, 1.05, 1.05, 1.05, 1.05])
bmean_3 = np.mean(bdata_3)
bsd_3 = np.std(bdata_3, ddof=1) 

bdata_4 = np.array([1.02, 1.03, 1.01, 1.03, 1.01])
bmean_4 = np.mean(bdata_4)
bsd_4 = np.std(bdata_4, ddof=1) 

bdata_5 = np.array([1.03, 1.02, 1.04, 1.04, 1.04])
bmean_5 = np.mean(bdata_5)
bsd_5 = np.std(bdata_5, ddof=1) 

bdata_6 = np.array([1.05, 1.04, 1.04, 1.06, 1.04])
bmean_6 = np.mean(bdata_6)
bsd_6 = np.std(bdata_6, ddof=1) 

bdata_7 = np.array([1.08, 1.04, 1.06, 1.04, 1.06])
bmean_7 = np.mean(bdata_7)
bsd_7 = np.std(bdata_7, ddof=1) 

bdata_8 = np.array([1.11, 1.11, 1.1, 1.08, 1.11])
bmean_8 = np.mean(bdata_8)
bsd_8 = np.std(bdata_8, ddof=1) 

bdata_9 = np.array([1.12, 1.08, 1.1, 1.12, 1.12])
bmean_9 = np.mean(bdata_9)
bsd_9 = np.std(bdata_9, ddof=1) 

cdata_1 = np.array([1.74, 1.74, 1.74, 1.74, 1.74])
cmean_1 = np.mean(cdata_1)
csd_1 = np.std(cdata_1, ddof=1) 

cdata_2 = np.array([1.73, 1.73, 1.73, 1.73, 1.73])
cmean_2 = np.mean(cdata_2)
csd_2 = np.std(cdata_2, ddof=1) 

cdata_3 = np.array([1.84, 1.84, 1.84, 1.84, 1.84])
cmean_3 = np.mean(cdata_3)
csd_3 = np.std(cdata_3, ddof=1) 

cdata_4 = np.array([1.81, 1.81, 1.79, 1.75, 1.79])
cmean_4 = np.mean(cdata_4)
csd_4 = np.std(cdata_4, ddof=1) 

cdata_5 = np.array([2.04, 1.92, 2, 2.02, 2.02])
cmean_5 = np.mean(cdata_5)
csd_5 = np.std(cdata_5, ddof=1) 

cdata_6 = np.array([2.14, 2.14, 2.17, 2.22, 2.09])
cmean_6 = np.mean(cdata_6)
csd_6 = np.std(cdata_6, ddof=1) 

cdata_7 = np.array([2.08, 2.01, 2.04, 2.01, 2.04])
cmean_7 = np.mean(cdata_7)
csd_7 = np.std(cdata_7, ddof=1) 

cdata_8 = np.array([1.95, 1.92, 1.99, 1.90, 1.91])
cmean_8 = np.mean(cdata_8)
csd_8 = np.std(cdata_8, ddof=1) 

cdata_9 = np.array([1.96, 1.98, 1.89, 1.96, 1.96])
cmean_9 = np.mean(cdata_9)
csd_9 = np.std(cdata_9, ddof=1) 

ddata_1 = np.array([1.28, 1.28, 1.28, 1.28, 1.28])
dmean_1 = np.mean(ddata_1)
dsd_1 = np.std(ddata_1, ddof=1) 

ddata_2 = np.array([1.17, 1.17, 1.17, 1.17, 1.17])
dmean_2 = np.mean(ddata_2)
dsd_2 = np.std(ddata_2, ddof=1) 

ddata_3 = np.array([1.15, 1.15, 1.15, 1.15, 1.15])
dmean_3 = np.mean(ddata_3)
dsd_3 = np.std(ddata_3, ddof=1) 

ddata_4 = np.array([1.12, 1.14, 1.11, 1.16, 1.12])
dmean_4 = np.mean(ddata_4)
dsd_4 = np.std(ddata_4, ddof=1) 

ddata_5 = np.array([1.08, 1.11, 1.11, 1.14, 1.14])
dmean_5 = np.mean(ddata_5)
dsd_5 = np.std(ddata_5, ddof=1) 

ddata_6 = np.array([1.15, 1.14, 1.12, 1.11, 1.09])
dmean_6 = np.mean(ddata_6)
dsd_6 = np.std(ddata_6, ddof=1) 

ddata_7 = np.array([1.14, 1.14, 1.11, 1.11, 1.12])
dmean_7 = np.mean(ddata_7)
dsd_7 = np.std(ddata_7, ddof=1) 

ddata_8 = np.array([1.2, 1.14, 1.12, 1.17, 1.18])
dmean_8 = np.mean(ddata_8)
dsd_8 = np.std(ddata_8, ddof=1) 

ddata_9 = np.array([1.19, 1.18, 1.17, 1.19, 1.18])
dmean_9 = np.mean(ddata_9)
dsd_9 = np.std(ddata_9, ddof=1) 

line = np.array([mean_1, mean_2, mean_3, mean_4, mean_5, mean_6, mean_7, mean_8, mean_9])
line_sd = np.array([sd_1, sd_2, sd_3, sd_4, sd_5, sd_6, sd_7, sd_8, sd_9])
plt.plot(x1, line, lw=1,color='red',marker='^',ms=10, markevery=1,markerfacecolor='red')
plt.fill_between(x1, line+line_sd, line-line_sd, alpha=0.3, color = "red")

line2 = np.array([bmean_1, bmean_2, bmean_3, bmean_4, bmean_5, bmean_6, bmean_7, bmean_8, bmean_9])
line2_sd = np.array([bsd_1, bsd_2, bsd_3, bsd_4, bsd_5, bsd_6, bsd_7, bsd_8, bsd_9])
plt.plot(x1, line2, lw=1,color='green', marker='o',ms=10, markevery=1,markerfacecolor='green')

plt.fill_between(x1, line2 - line2_sd, line2 + line2_sd, alpha=0.3, color = "green")
plt.legend(['Alpha_1_groupA','Alpha_0_groupA'],fontsize=15)
#plt.title("Initial: $B^1_a$(1.83,3.32)/$B^0_a$(1.22,4.99); True: $B^1_a$(1.94,3.32)/$B^0_a$(1.13,4.99)",fontsize=15)
plt.xlabel('Number of Samples Observed', fontsize=15)
plt.ylabel('Alpha Estimates for Group A', fontsize=15)
plt.show()

line3 = np.array([cmean_1, cmean_2, cmean_3, cmean_4, cmean_5, cmean_6, cmean_7, cmean_8, cmean_9])
line3_sd = np.array([csd_1, csd_2, csd_3, csd_4, csd_5, csd_6, csd_7, csd_8, csd_9])
plt.plot(x1, line3, lw=1,color='red', marker='^',ms=10, markevery=1,markerfacecolor='red',alpha = 0.7)

plt.fill_between(x1, line3 - line3_sd, line3 + line3_sd, alpha=0.3, color = "red")

line3 = np.array([dmean_1, dmean_2, dmean_3, dmean_4, dmean_5, dmean_6, dmean_7, dmean_8, dmean_9])
line3_sd = np.array([dsd_1, dsd_2, dsd_3, dsd_4, dsd_5, dsd_6, dsd_7, dsd_8, dsd_9])
plt.plot(x1, line3, lw=1,color='green', marker='o',ms=10, markevery=1,markerfacecolor='green',alpha = 0.7)

plt.fill_between(x1, line3 - line3_sd, line3 + line3_sd, alpha=0.3, color = "green")
plt.legend(['Alpha_1_groupB','Alpha_0_groupB'],fontsize=15)
#plt.title("Initial: $B^1_b$(1.74,3.53)/$B^0_b$(1.28,6.10); True: $B^1_b$(1.97,3.53)/$B^0_b$(1.19,6.10)",fontsize=15)
plt.xlabel('Number of Samples Observed', fontsize=15)
plt.ylabel('Alpha Estimates for Group B', fontsize=15)
plt.show()


# %% [markdown]
# Adaptive Data Debiasing through Bounded Exploraiton and Fairness

This code is under the Gaussian 2 groups with fairness setting

# %% [markdown]
Define true, initial, and other hyper-parameters 

# %% [code]
from scipy.stats import norm
from sklearn.linear_model import LogisticRegression
from statistics import median
from sklearn.utils import shuffle
import numpy as np
import pandas as pd
import matplotlib.pyplot as plt

# Defining True Parameters
mu_1_true_group1 = 10
mu_0_true_group1 = 7
mu_1_true_group0 = 9
mu_0_true_group0 = 6
sd = 1 

fair_constarint = ['single', 'min_cost', 'independence', 'fnr']
fair = 1
# Defining Initial Assumed Parameters
mu1_init_group1 = 9
mu0_init_group1 = 6
mu1_init_group0 = 8
mu0_init_group0 = 5

true_pop_prob_group1 = 0.65
exploration_porb_group1 = 1
generating_samples_group1 = 15000
existing_1_customers_group1 = 1000
existing_0_customers_group1 = 1000
true_pop_prob_group0 = 0.65
exploration_porb_group0 = 1
generating_samples_group0 = 15000
existing_1_customers_group0 = 1000
existing_0_customers_group0 = 1000
batchsize = 1000
reference_quantile = 0.6

TP_group1 = 0
FP_group1 = 0
FN_group1 = 0
TN_group1 = 0
TP_oracle_group1 = 0 
FP_oracle_group1 = 0
FN_oracle_group1 = 0
TN_oracle_group1 = 0


TP_group0 = 0
FP_group0 = 0
FN_group0 = 0
TN_group0 = 0
TP_oracle_group0 = 0 
FP_oracle_group0 = 0
FN_oracle_group0 = 0
TN_oracle_group0 = 0

# %% [markdown]
Generate initial and incoming data and forget initial/true parameters defined above. From now on, the true and initial parameters are obtained by fitting data into distributions. 

# %% [code]
# Generate initial data
data_1_group1 = np.random.normal(mu1_init_group1,sd,size=existing_1_customers_group1)
data_0_group1 = np.random.normal(mu0_init_group1,sd,size=existing_0_customers_group1)
data_1_group0 = np.random.normal(mu1_init_group0,sd,size=existing_1_customers_group0)
data_0_group0 = np.random.normal(mu0_init_group0,sd,size=existing_0_customers_group0)

# Generate incoming true data
label1_group1 = np.random.normal(mu_1_true_group1,sd,size =int(generating_samples_group1*(1-true_pop_prob_group1)))
label0_group1 = np.random.normal(mu_0_true_group1,sd,size =int(generating_samples_group1*true_pop_prob_group1))
label1_group0 = np.random.normal(mu_1_true_group0,sd,size =int(generating_samples_group0*(1-true_pop_prob_group0)))
label0_group0 = np.random.normal(mu_0_true_group0,sd,size =int(generating_samples_group0*true_pop_prob_group0))

# Obtain initial parameters via initial data
mu_1_init_group1, sd = norm.fit(data_1_group1, fscale = sd)
mu_0_init_group1, sd = norm.fit(data_0_group1, fscale = sd)
mu_1_init_group0, sd = norm.fit(data_1_group0, fscale = sd)
mu_0_init_group0, sd = norm.fit(data_0_group0, fscale = sd)

mu_1_group1 = mu_1_init_group1
mu_0_group1 = mu_0_init_group1
mu_1_group0 = mu_1_init_group0
mu_0_group0 = mu_0_init_group0

# Obtain true parameters via incoming true data
mu_1_true_group1, sd = norm.fit(label1_group1, fscale = sd)
mu_0_true_group1, sd = norm.fit(label0_group1, fscale = sd)
mu_1_true_group0, sd = norm.fit(label1_group0, fscale = sd)
mu_0_true_group0, sd = norm.fit(label0_group0, fscale = sd)

# %% [markdown]
Define cost matrix and build confusion matrix given threshold

# %% [code]
# Find the confusion matrix given threshold
def CM(Y_test,y_pred,threshold):
    # The Confusion Matrix given a threshold
    y_pred = np.where(y_pred>threshold,1,0)
    cm = pd.DataFrame(confusion_matrix(Y_test,y_pred))
    cm.rename(columns={0:'Pred_neg', 1:'Pred_pos'},
         index = {0:'Actual_neg',1:'Actual_pos'},inplace=True)
    cm['Total'] = cm['Pred_neg'] + cm['Pred_pos'] 
    rowsum = cm.sum()
    rowsum.name = 'Total'
    cm = cm.append(rowsum.transpose())
    
    # TP/TN/FP/FN/TPR/FPR
    P = cm['Total']['Actual_pos']
    N = cm['Total']['Actual_neg']
    TP = cm['Pred_pos']['Actual_pos']
    TN = cm['Pred_neg']['Actual_neg']
    FP = cm['Pred_pos']['Actual_neg']
    FN = cm['Pred_neg']['Actual_pos']
    TPR = np.round(TP/P,2)
    FPR = np.round(FP/N,2)
    return(cm, TPR, FPR)

# Define the cost matrix
COST_MATRIX = [[0, -3/6],
               [0,  3/6]]

# %% [markdown]
# Parameter Description
                                 
| Name        | Description |
| ----------- | ----------- |
| base_rates  | Base rate of label 1 per group       |
| base_rate   | The overall base rate label 1        |
| proportions | Fraction of individuals per group    |
| rocs| ROC per group |

# %% [markdown]
Find the initial classifier threshold and oracle classifier threshold from the initial data and incoming true data respectively. In addition, find out the corresponding LB and UB

# %% [code]
# Find fair classifier for the inital training set

# Find the parameters proportions, base_rate and base_rates 
proportions = {'Group1': (len(data_1_group1) + len(data_0_group1))/(len(data_1_group1) + len(data_0_group1) + len(data_1_group0) + len(data_0_group0)), 
               'Group0': 1 - (len(data_1_group1) + len(data_0_group1))/(len(data_1_group1) + len(data_0_group1) + len(data_1_group0) + len(data_0_group0))}
base_rate = (len(data_1_group1) + len(data_1_group0))/(len(data_1_group1) + len(data_0_group1) + len(data_1_group0) + len(data_0_group0))
d = {'Group1': len(data_1_group1)/(len(data_1_group1) + len(data_0_group1)), 'Group0': len(data_1_group0)/(len(data_1_group0) + len(data_0_group0))}
base_rates = pd.Series(data = d, index = ['Group1','Group0'])

# Find the ROC curve by construting confusion matrix 
yprob1 = np.append(data_1_group1, data_0_group1)
yprob0 = np.append(data_1_group0, data_0_group0)
  
TPR1 = []
FPR1 = []
threshold1 = [] 
for threshold in range(201,0,-1):
    cm, TPR, FPR = CM(np.append(np.ones(len(data_1_group1)),np.zeros(len(data_0_group1))),yprob1,(mu_0_true_group0-3*sd)+(mu_1_true_group1+3*sd - mu_0_true_group0+3*sd)*threshold/200)
    TPR1 = TPR1 + [TPR]
    FPR1 = FPR1 + [FPR]
    threshold1 = threshold1 + [(mu_0_true_group0-3*sd)+(mu_1_true_group1+3*sd - mu_0_true_group0+3*sd)*threshold/200]
TPR1 = np.array(TPR1)
FPR1 = np.array(FPR1)
threshold1 = np.array(threshold1)

TPR0 = []
FPR0 = []
threshold0 = []
for threshold in range(201,0,-1):
    cm, TPR, FPR = CM(np.append(np.ones(len(data_1_group0)),np.zeros(len(data_0_group0))),yprob0,(mu_0_true_group0-3*sd)+(mu_1_true_group1+3*sd - mu_0_true_group0+3*sd)*threshold/200)
    TPR0 = TPR0 + [TPR]
    FPR0 = FPR0 + [FPR]
    threshold0 = threshold0 + [(mu_0_true_group0-3*sd)+(mu_1_true_group1+3*sd - mu_0_true_group0+3*sd)*threshold/200]
TPR0 = np.array(TPR0)
FPR0 = np.array(FPR0)
threshold0 = np.array(threshold0)

# Find the parameter rocs 
rocs = {'Group1': (FPR1, TPR1, threshold1), 'Group0': (FPR0, TPR0,threshold0)}

# Find the initial fairness classifier_1 and classifier_2 
thresholds_data = find_thresholds(rocs, proportions, base_rate, base_rates, COST_MATRIX)
if fair != 0:
    classifier_group1 = thresholds_data[fair_constarint[fair]][0]['Group1']
    classifier_group0 = thresholds_data[fair_constarint[fair]][0]['Group0']
else: 
    classifier_group1 = thresholds_data[fair_constarint[fair]][0]
    classifier_group0 = thresholds_data[fair_constarint[fair]][0]
print (classifier_group1, classifier_group0)

# %% [code]
# Find oracle fair classifier for the entire data

# Find the parameters proportions, base_rate and base_rates 
proportions = {'Group1': (len(label1_group1) + len(label0_group1))/(len(label1_group1) + len(label0_group1) + len(label1_group0) + len(label0_group0)), 
               'Group0': 1 - (len(label1_group1) + len(label0_group1))/(len(label1_group1) + len(label0_group1) + len(label1_group0) + len(label0_group0))}
base_rate = (len(label1_group1) + len(label1_group0))/(len(label1_group1) + len(label0_group1) + len(label1_group0) + len(label0_group0))
d = {'Group1': len(label1_group1)/(len(label1_group1) + len(label0_group1)), 'Group0': len(label1_group0)/(len(label1_group0) + len(label0_group0))}
base_rates = pd.Series(data = d, index = ['Group1','Group0'])

# Find the ROC curve by construting confusion matrix 
yprob1 = np.append(label1_group1, label0_group1)
yprob0 = np.append(label1_group0, label0_group0)
  
TPR1 = []
FPR1 = []
threshold1 = []
for threshold in range(201,0,-1):
    cm, TPR, FPR = CM(np.append(np.ones(len(label1_group1)),np.zeros(len(label0_group1))),yprob1,(mu_0_true_group0-3*sd)+(mu_1_true_group1+3*sd - mu_0_true_group0+3*sd)*threshold/200)
    TPR1 = TPR1 + [TPR]
    FPR1 = FPR1 + [FPR]
    threshold1 = threshold1 + [(mu_0_true_group0-3*sd)+(mu_1_true_group1+3*sd - mu_0_true_group0+3*sd)*threshold/200]
TPR1 = np.array(TPR1)
FPR1 = np.array(FPR1)
threshold1 = np.array(threshold1)

TPR0 = []
FPR0 = []
threshold0 = []
for threshold in range(201,0,-1):
    cm, TPR, FPR = CM(np.append(np.ones(len(label1_group0)),np.zeros(len(label0_group0))),yprob0,(mu_0_true_group0-3*sd)+(mu_1_true_group1+3*sd - mu_0_true_group0+3*sd)*threshold/200)
    TPR0 = TPR0 + [TPR]
    FPR0 = FPR0 + [FPR]
    threshold0 = threshold0 + [(mu_0_true_group0-3*sd)+(mu_1_true_group1+3*sd - mu_0_true_group0+3*sd)*threshold/200]
TPR0 = np.array(TPR0)
FPR0 = np.array(FPR0)
threshold0 = np.array(threshold0)

# Find the parameter rocs 
rocs = {'Group1': (FPR1, TPR1, threshold1), 'Group0': (FPR0, TPR0, threshold0)}

# Find the initial fairness classifier_1 and classifier_2 
thresholds_data = find_thresholds(rocs, proportions, base_rate, base_rates, COST_MATRIX)

if fair != 0:
    classifier_oracle_value_1 = thresholds_data[fair_constarint[fair]][0]['Group1']
    classifier_oracle_value_0 = thresholds_data[fair_constarint[fair]][0]['Group0']
else: 
    classifier_oracle_value_1 = thresholds_data[fair_constarint[fair]][0]
    classifier_oracle_value_0 = thresholds_data[fair_constarint[fair]][0]
print (classifier_oracle_value_1, classifier_oracle_value_0)

# %% [code]
# Find the LB and UB (Using alpha = 60 for label 0 and median for label 1)
temp = 2*norm.cdf(norm.ppf(reference_quantile,mu_0_group1,sd),mu_0_group1,sd) -\
            norm.cdf(classifier_group1,mu_0_group1,sd)
LB_group1 = float(norm.ppf(temp,mu_0_group1,sd))

temp = 2*norm.cdf(mu_1_group1,mu_1_group1,sd) -\
            norm.cdf(LB_group1,mu_1_group1,sd)
UB_group1 = float(norm.ppf(temp,mu_1_group1,sd))

# Find the LB and UB (Using alpha = 60 for label 0 and median for label 1)
temp = 2*norm.cdf(norm.ppf(reference_quantile,mu_0_group0,sd),mu_0_group0,sd) -\
            norm.cdf(classifier_group0,mu_0_group0,sd)
LB_group0 = float(norm.ppf(temp,mu_0_group0,sd))

temp = 2*norm.cdf(mu_1_group0,mu_1_group0,sd) -\
            norm.cdf(LB_group0,mu_1_group0,sd)
UB_group0 = float(norm.ppf(temp,mu_1_group0,sd))

# %% [markdown]
Build the info dataframe, which contains the information of ('True Label','Values','Decision','RP_1','RP_0', 'Classifier','Regret','Explore_Prob')

# %% [code]
info_group1 = pd.DataFrame(columns = ['True Label','Values','Decision','RP_1_group1','RP_0_group1',
                                      'Classifier_group1', 'RP_1_group0','RP_0_group0',
                                      'Classifier_group0', 'Group Num', 'Regret','Explore_Prob_group1', 'Explore_Prob_group0'])

# Assign feature values to the dataframe
info_group1['Values'] = np.concatenate((label1_group1, label0_group1, label1_group0, label0_group0))
# Assign true labels to the dataframe
info_group1.loc[0:len(label1_group1),'True Label'] = 1
info_group1.loc[len(label1_group1):(len(label1_group1)+len(label0_group1)),'True Label'] = 0
info_group1.loc[(len(label1_group1)+len(label0_group1)):(len(label1_group1)+len(label0_group1)+ len(label1_group0)),'True Label'] = 1
info_group1.loc[(len(label1_group1)+len(label0_group1)+ len(label1_group0)): ,'True Label'] = 0
# Assign group number to the dataframe
info_group1.loc[0:(len(label1_group1)+len(label0_group1)),'Group Num'] = 1
info_group1.loc[(len(label1_group1)+len(label0_group1)):,'Group Num'] = 0
# Shuffle the dataframe
info_group1 = shuffle(info_group1)
# Resign the index 
info_group1.reset_index(inplace=True, drop=True)

# %% [markdown]
Perform the parameter update once the size of data falling into the updating range reaches the batchsize

# %% [code]
i = 0
# Create loop for updating
while (i <= len(info_group1)-1):
    data_1_trun_group1 = []
    data_0_trun_group1 = []
    data_1_trun_group0 = []
    data_0_trun_group0 = []
    
    # find quantile of reference point including label 0 tail for group 1
    portion_right0_group1 = norm.sf(norm.ppf(reference_quantile,mu_0_group1,sd),mu_0_group1,sd)/norm.sf(LB_group1,mu_0_group1,sd)
    portion_left0_group1 = 1 - portion_right0_group1
    
    portion_right1_group1 = norm.sf(norm.ppf(reference_quantile,mu_1_group1,sd),mu_1_group1,sd)/norm.sf(LB_group1,mu_1_group1,sd)
    portion_left1_group1 = 1 - portion_right1_group1
    
    # find quantile of reference point including label 0 tail for group 0
    portion_right0_group0 = norm.sf(norm.ppf(reference_quantile,mu_0_group0,sd),mu_0_group0,sd)/norm.sf(LB_group0,mu_0_group0,sd)
    portion_left0_group0 = 1 - portion_right0_group0
    
    portion_right1_group0 = norm.sf(norm.ppf(reference_quantile,mu_1_group0,sd),mu_1_group0,sd)/norm.sf(LB_group0,mu_1_group0,sd)
    portion_left1_group0 = 1 - portion_right1_group0
    
    k1_group1 = len(data_1_trun_group1)
    k0_group1 = len(data_0_trun_group1)
    k1_group0 = len(data_1_trun_group0)
    k0_group0 = len(data_0_trun_group0)
    
    #loop into each batch
    while ((min(k1_group1, k0_group1, k1_group0, k0_group0) <= batchsize) & (i <= len(info_group1)-1)):
        
        if info_group1.loc[i,'Group Num'] == 1:

            # Make decisions
            if (info_group1.loc[i,'Values'] >= classifier_group1) & (info_group1.loc[i,'Values']<=UB_group1):
                info_group1.loc[i,'Decision'] = 1
            elif (info_group1.loc[i,'Values'] < classifier_group1) & (info_group1.loc[i,'Values']>=LB_group1) & (np.random.uniform(size=1)<=exploration_porb_group1):
                info_group1.loc[i,'Decision'] = 1
            elif (info_group1.loc[i,'Values'] >= classifier_group1) & (info_group1.loc[i,'Values']>UB_group1):
                info_group1.loc[i,'Decision'] = 1
            elif (info_group1.loc[i,'Values'] < classifier_group1) & (info_group1.loc[i,'Values']<LB_group1):
                info_group1.loc[i,'Decision'] = 3
            else:
                info_group1.loc[i,'Decision'] = 0   

            # Record confusion matrix
            if (info_group1.loc[i,'True Label']==1) & ((info_group1.loc[i,'Decision']==1) or (info_group1.loc[i,'Decision']==2)):
                TP_group1 += 1
            elif (info_group1.loc[i,'True Label']==1) & ((info_group1.loc[i,'Decision']==0) or (info_group1.loc[i,'Decision']==3)):
                FN_group1 += 1
            elif (info_group1.loc[i,'True Label']==0) & ((info_group1.loc[i,'Decision']==0) or (info_group1.loc[i,'Decision']==3)):
                TN_group1 += 1
            else:
                FP_group1 += 1

            # Record oracle matrix
            if (info_group1.loc[i,'Values'] >= classifier_oracle_value_1) & (info_group1.loc[i,'True Label']==1):
                TP_oracle_group1 += 1
            elif (info_group1.loc[i,'Values'] >= classifier_oracle_value_1) & (info_group1.loc[i,'True Label']==0):
                FP_oracle_group1 += 1
            elif (info_group1.loc[i,'Values'] < classifier_oracle_value_1) & (info_group1.loc[i,'True Label']==1):
                FN_oracle_group1 += 1
            else:
                TN_oracle_group1 += 1


            # Record label 1 information for updating
            if (info_group1.loc[i,'True Label']==1) & ((info_group1.loc[i,'Decision']==1) or (info_group1.loc[i,'Decision']==2)):
                data_1_group1 = np.append(data_1_group1, info_group1.loc[i,'Values'])
                if (((info_group1.loc[i,'Values'] < classifier_group1) & (info_group1.loc[i,'Decision']==1)) 
                   or ((info_group1.loc[i,'Values'] >= classifier_group1) & (info_group1.loc[i,'Decision']==1) & (np.random.uniform(size=1)<=exploration_porb_group1))):
                    data_1_trun_group1 = np.append(data_1_trun_group1, info_group1.loc[i,'Values'])
            else:
                data_1_group1 = data_1_group1 
                data_1_trun_group1 = data_1_trun_group1


            # Record label 0 information for updating
            if (info_group1.loc[i,'True Label']==0) & ((info_group1.loc[i,'Decision']==1) or (info_group1.loc[i,'Decision']==2)):
                data_0_group1 = np.append(data_0_group1, info_group1.loc[i,'Values'])
                if (((info_group1.loc[i,'Values'] < classifier_group1) & (info_group1.loc[i,'Decision']==1)) 
                    or ((info_group1.loc[i,'Values'] >= classifier_group1) & (np.random.uniform(size=1)<=exploration_porb_group1))):
                    data_0_trun_group1 = np.append(data_0_trun_group1, info_group1.loc[i,'Values'])
            else:
                data_0_group1 = data_0_group1 
                data_0_trun_group1 = data_0_trun_group1 
        else:
            
            # Make decisions
            if (info_group1.loc[i,'Values'] >= classifier_group0) & (info_group1.loc[i,'Values']<=UB_group0):
                info_group1.loc[i,'Decision'] = 1
            elif (info_group1.loc[i,'Values'] < classifier_group0) & (info_group1.loc[i,'Values']>=LB_group0) & (np.random.uniform(size=1)<=exploration_porb_group0):
                info_group1.loc[i,'Decision'] = 1
            elif (info_group1.loc[i,'Values'] >= classifier_group0) & (info_group1.loc[i,'Values']>UB_group0):
                info_group1.loc[i,'Decision'] = 1
            elif (info_group1.loc[i,'Values'] < classifier_group0) & (info_group1.loc[i,'Values']<LB_group0):
                info_group1.loc[i,'Decision'] = 3
            else:
                info_group1.loc[i,'Decision'] = 0   

            # Record confusion matrix
            if (info_group1.loc[i,'True Label']==1) & ((info_group1.loc[i,'Decision']==1) or (info_group1.loc[i,'Decision']==2)):
                TP_group0 += 1
            elif (info_group1.loc[i,'True Label']==1) & ((info_group1.loc[i,'Decision']==0) or (info_group1.loc[i,'Decision']==3)):
                FN_group0 += 1
            elif (info_group1.loc[i,'True Label']==0) & ((info_group1.loc[i,'Decision']==0) or (info_group1.loc[i,'Decision']==3)):
                TN_group0 += 1
            else:
                FP_group0 += 1

            # Record oracle matrix
            if (info_group1.loc[i,'Values'] >= classifier_oracle_value_0) & (info_group1.loc[i,'True Label']==1):
                TP_oracle_group0 += 1
            elif (info_group1.loc[i,'Values'] >= classifier_oracle_value_0) & (info_group1.loc[i,'True Label']==0):
                FP_oracle_group0 += 1
            elif (info_group1.loc[i,'Values'] < classifier_oracle_value_0) & (info_group1.loc[i,'True Label']==1):
                FN_oracle_group0 += 1
            else:
                TN_oracle_group0 += 1


            # Record label 1 information for updating
            if (info_group1.loc[i,'True Label']==1) & ((info_group1.loc[i,'Decision']==1) or (info_group1.loc[i,'Decision']==2)):
                data_1_group0 = np.append(data_1_group0, info_group1.loc[i,'Values'])
                if (((info_group1.loc[i,'Values'] < classifier_group0) & (info_group1.loc[i,'Decision']==1)) 
                   or ((info_group1.loc[i,'Values'] >= classifier_group0) & (info_group1.loc[i,'Decision']==1) & (np.random.uniform(size=1)<=exploration_porb_group0))):
                    data_1_trun_group0 = np.append(data_1_trun_group0, info_group1.loc[i,'Values'])
            else:
                data_1_group0 = data_1_group0 
                data_1_trun_group0 = data_1_trun_group0


            # Record label 0 information for updating
            if (info_group1.loc[i,'True Label']==0) & ((info_group1.loc[i,'Decision']==1) or (info_group1.loc[i,'Decision']==2)):
                data_0_group0 = np.append(data_0_group0, info_group1.loc[i,'Values'])
                if (((info_group1.loc[i,'Values'] < classifier_group0) & (info_group1.loc[i,'Decision']==1)) 
                    or ((info_group1.loc[i,'Values'] >= classifier_group0) & (np.random.uniform(size=1)<=exploration_porb_group0))):
                    data_0_trun_group0 = np.append(data_0_trun_group0, info_group1.loc[i,'Values'])
            else:
                data_0_group0 = data_0_group0
                data_0_trun_group0 = data_0_trun_group0
             
        
        k1_group1 = len(data_1_trun_group1)
        k0_group1 = len(data_0_trun_group1)
        k1_group0 = len(data_1_trun_group0)
        k0_group0 = len(data_0_trun_group0)
        i = i + 1
        
    # Record new mean value/RP and classifier
    info_group1.loc[i-1,'RP_1_group1'] = np.quantile(data_1_trun_group1, portion_left1_group1) - norm.ppf(reference_quantile,0,sd) #median(data_1_trun_group1)
    info_group1.loc[i-1,'RP_0_group1'] =  np.quantile(data_0_trun_group1, portion_left0_group1) - norm.ppf(reference_quantile,0,sd)
    info_group1.loc[i-1,'Classifier_group1'] = classifier_group1
    info_group1.loc[i-1,'Explore_Prob_group1'] = exploration_porb_group1
        
    info_group1.loc[i-1,'RP_1_group0'] = np.quantile(data_1_trun_group0, portion_left1_group0) - norm.ppf(reference_quantile,0,sd) #median(data_1_trun_group0)
    info_group1.loc[i-1,'RP_0_group0'] =  np.quantile(data_0_trun_group0, portion_left0_group0) - norm.ppf(reference_quantile,0,sd)
    info_group1.loc[i-1,'Classifier_group0'] = classifier_group0
    info_group1.loc[i-1,'Explore_Prob_group0'] = exploration_porb_group0
    info_group1.loc[i-1,'Regret'] = (FP_group1 + FN_group1 + FP_group0 + FN_group0)-(FP_oracle_group1 + FN_oracle_group1 + FP_oracle_group0 + FN_oracle_group0)

    # Reassign new values to parameters
    mu_1_group1 = info_group1.loc[i-1,'RP_1_group1']
    mu_0_group1 = info_group1.loc[i-1,'RP_0_group1']
    mu_1_group0 = info_group1.loc[i-1,'RP_1_group0']
    mu_0_group0 = info_group1.loc[i-1,'RP_0_group0']
    
    
    # Find the parameters proportions, base_rate and base_rates 
    proportions = {'Group1': (len(data_1_group1) + len(data_0_group1))/(len(data_1_group1) + len(data_0_group1) + len(data_1_group0) + len(data_0_group0)), 
                   'Group0': 1 - (len(data_1_group1) + len(data_0_group1))/(len(data_1_group1) + len(data_0_group1) + len(data_1_group0) + len(data_0_group0))}
    base_rate = (len(data_1_group1) + len(data_1_group0))/(len(data_1_group1) + len(data_0_group1) + len(data_1_group0) + len(data_0_group0))
    d = {'Group1': len(data_1_group1)/(len(data_1_group1) + len(data_0_group1)), 'Group0': len(data_1_group0)/(len(data_1_group0) + len(data_0_group0))}
    base_rates = pd.Series(data = d, index = ['Group1','Group0'])

    # Find the ROC curve by construting confusion matrix 
    yprob1 = np.append(data_1_group1, data_0_group1)
    yprob0 = np.append(data_1_group0, data_0_group0)

    TPR1 = []
    FPR1 = []
    threshold1 = []
    for threshold in range(201,0,-1):
        cm, TPR, FPR = CM(np.append(np.ones(len(data_1_group1)),np.zeros(len(data_0_group1))),yprob1,(mu_0_true_group0-3*sd)+(mu_1_true_group1+3*sd - mu_0_true_group0+3*sd)*threshold/200)
        TPR1 = TPR1 + [TPR]
        FPR1 = FPR1 + [FPR]
        threshold1 = threshold1 + [(mu_0_true_group0-3*sd)+(mu_1_true_group1+3*sd - mu_0_true_group0+3*sd)*threshold/200]
    TPR1 = np.array(TPR1)
    FPR1 = np.array(FPR1)
    threshold1 = np.array(threshold1)

    TPR0 = []
    FPR0 = []
    threshold0 = []
    for threshold in range(201,0,-1):
        cm, TPR, FPR = CM(np.append(np.ones(len(data_1_group0)),np.zeros(len(data_0_group0))),yprob0,(mu_0_true_group0-3*sd)+(mu_1_true_group1+3*sd - mu_0_true_group0+3*sd)*threshold/200)
        TPR0 = TPR0 + [TPR]
        FPR0 = FPR0 + [FPR]
        threshold0 = threshold0 + [(mu_0_true_group0-3*sd)+(mu_1_true_group1+3*sd - mu_0_true_group0+3*sd)*threshold/200]
    TPR0 = np.array(TPR0)
    FPR0 = np.array(FPR0)
    threshold0 = np.array(threshold0)

    # Find the parameter rocs 
    rocs = {'Group1': (FPR1, TPR1, threshold1), 'Group0': (FPR0, TPR0,threshold0)}

    # Find the initial fairness classifier_1 and classifier_2 
    thresholds_data = find_thresholds(rocs, proportions, base_rate, base_rates, COST_MATRIX)
    
    if fair != 0:
        classifier_group1 = thresholds_data[fair_constarint[fair]][0]['Group1']
        classifier_group0 = thresholds_data[fair_constarint[fair]][0]['Group0']
    else: 
        classifier_group1 = thresholds_data[fair_constarint[fair]][0]
        classifier_group0 = thresholds_data[fair_constarint[fair]][0]
        
    # Find the LB and UB (Using alpha = 60 for label 0 and median for label 1)
    temp = 2*norm.cdf(norm.ppf(reference_quantile,mu_0_group1,sd),mu_0_group1,sd) -\
                norm.cdf(classifier_group1,mu_0_group1,sd)
    LB_group1 = float(norm.ppf(temp,mu_0_group1,sd))

    temp = 2*norm.cdf(mu_1_group1,mu_1_group1,sd) -\
                norm.cdf(LB_group1,mu_1_group1,sd)
    UB_group1 = float(norm.ppf(temp,mu_1_group1,sd))

    # Find the LB and UB (Using alpha = 60 for label 0 and median for label 1)
    temp = 2*norm.cdf(norm.ppf(reference_quantile,mu_0_group0,sd),mu_0_group0,sd) -\
                norm.cdf(classifier_group0,mu_0_group0,sd)
    LB_group0 = float(norm.ppf(temp,mu_0_group0,sd))

    temp = 2*norm.cdf(mu_1_group0,mu_1_group0,sd) -\
                norm.cdf(LB_group0,mu_1_group0,sd)
    UB_group0 = float(norm.ppf(temp,mu_1_group0,sd))

 
    theoretical_value = norm.sf(classifier_group1,mu_0_group1,sd)/norm.sf(LB_group1,mu_0_group1,sd)
    experiment_value = len(data_0_trun_group1[data_0_trun_group1>=classifier_group1])/len(data_0_trun_group1[data_0_trun_group1>=LB_group1])
    diff = abs(theoretical_value - experiment_value)
    exploration_porb_group1 = 1 - 0.1*(i//((generating_samples_group1+generating_samples_group0)/10))
    
    theoretical_value = norm.sf(classifier_group0,mu_0_group0,sd)/norm.sf(LB_group0,mu_0_group0,sd)
    experiment_value = len(data_0_trun_group0[data_0_trun_group0>=classifier_group0])/len(data_0_trun_group0[data_0_trun_group0>=LB_group0])
    diff = abs(theoretical_value - experiment_value)
    exploration_porb_group0 = 1 - 0.1*(i//((generating_samples_group1+generating_samples_group0)/10))

# %% [code]
# Add initial information to thhe DataFrame
initial_information = []
initial_information.insert(0, {'True Label': 'NA','Values': 'NA','Decision': 'NA','RP_1_group1': mu_1_init_group1,'RP_0_group1': mu_0_init_group1,
                               'Classifier_group1': 'NA','RP_1_group0':mu_1_init_group0,'RP_0_group0':mu_0_init_group0,'Classifier_group0': 'NA',
                               'Group Num': 'NA', 'Regret': 0,'Explore_Prob_group1':1, 'Explore_Prob_group0':1})
info_group1 = pd.concat([pd.DataFrame(initial_information), info_group1], ignore_index=True)

# %% [markdown]
Performance visualization

# %% [code]
plt.plot(np.arange(1,len(info_group1['RP_1_group1'].dropna()),1),info_group1['RP_1_group1'].dropna()[:len(info_group1['RP_1_group1'].dropna())-1],
         lw=4,color='red',marker='^',ms=14, markevery=40,markerfacecolor='red')
plt.plot(np.arange(1,len(info_group1['RP_0_group1'].dropna()),1),info_group1['RP_0_group1'].dropna()[:len(info_group1['RP_0_group1'].dropna())-1],
         lw=4,color='green', marker='o',ms=14, markevery=40,markerfacecolor='green')
plt.legend(['mu_1_groupA','mu_0_groupA'],fontsize=20)
plt.xlabel('Number of Updates', fontsize=20)
plt.ylabel('Group 1 Mean Estimates', fontsize=20)
plt.show()

plt.plot(np.arange(1,len(info_group1['RP_1_group0'].dropna()),1),info_group1['RP_1_group0'].dropna()[:len(info_group1['RP_1_group0'].dropna())-1],
         lw=4,color='red',marker='^',ms=14, markevery=40,markerfacecolor='red')
plt.plot(np.arange(1,len(info_group1['RP_0_group0'].dropna()),1),info_group1['RP_0_group0'].dropna()[:len(info_group1['RP_0_group0'].dropna())-1],
         lw=4,color='green', marker='o',ms=14, markevery=40,markerfacecolor='green')
plt.legend(['mu_1_groupB','mu_0_groupB'],fontsize=20)
plt.xlabel('Number of Updates', fontsize=20)
plt.ylabel('Group 0 Mean Estimates', fontsize=20)
plt.show()

plt.plot(np.arange(1,len(info_group1['RP_1_group1'].dropna()),1),info_group1['RP_1_group1'].dropna()[:len(info_group1['RP_1_group1'].dropna())-1]-mu_1_true_group1,
         lw=4,color='red',marker='^',ms=14, markevery=40,markerfacecolor='red')
plt.plot(np.arange(1,len(info_group1['RP_0_group1'].dropna()),1),info_group1['RP_0_group1'].dropna()[:len(info_group1['RP_0_group1'].dropna())-1]-mu_0_true_group1,
         lw=4,color='green', marker='o',ms=14, markevery=40,markerfacecolor='green')
plt.plot(np.arange(1,len(info_group1['RP_1_group0'].dropna()),1),info_group1['RP_1_group0'].dropna()[:len(info_group1['RP_1_group0'].dropna())-1]-mu_1_true_group0,
         lw=4,color='blue',marker='^',ms=14, markevery=40,markerfacecolor='blue')
plt.plot(np.arange(1,len(info_group1['RP_0_group0'].dropna()),1),info_group1['RP_0_group0'].dropna()[:len(info_group1['RP_0_group0'].dropna())-1]-mu_0_true_group0,
         lw=4,color='black', marker='o',ms=14, markevery=40,markerfacecolor='black')
plt.legend(['RP_1_groupA','RP_0_groupA','RP_1_groupB','RP_0_groupB'],fontsize=20)
plt.xlabel('Number of Updates', fontsize=20)
plt.ylabel('Differences w.r.t True ', fontsize=20)
plt.show()

plt.plot(np.arange(1,len(info_group1['Explore_Prob_group1'].dropna())+1,1),info_group1['Explore_Prob_group1'].dropna(),lw=4,color='black',marker='^',ms=14, markevery=40,markerfacecolor='black')
plt.plot(np.arange(1,len(info_group1['Explore_Prob_group0'].dropna())+1,1),info_group1['Explore_Prob_group0'].dropna(),lw=4,color='red',marker='^',ms=14, markevery=40,markerfacecolor='red')
plt.legend(['Explore_Prob_groupA','Explore_Prob_groupB'],fontsize=20)
plt.xlabel('Number of Updates', fontsize=20)
plt.ylabel('Explore_Prob', fontsize=20)
plt.show()

plt.plot(info_group1['Regret'].dropna().index,info_group1['Regret'].dropna(),lw=4,color='black',marker='^',ms=14, markevery=40,markerfacecolor='black')
plt.legend(['Regret'],fontsize=20)
plt.xlabel('Number of Samples Observed', fontsize=20)
plt.ylabel('Regret', fontsize=20)
plt.show()

# %% [code]
info_group1.to_csv('Gaussian_two_groups_fairNO.csv')
#object_name = pd.read_csv('file_name.csv')

# %% [markdown]
# FICO Data

# %% [code]
from random import choices
population = FICO['pdf'].index.tolist()
weights_asian = FICO['pdf']['Asian'].values
weights_black = FICO['pdf']['Black'].values
weights_hispanic = FICO['pdf']['Hispanic'].values
weights_white = FICO['pdf']['White'].values

# Generate data according to pdf
asian_data = choices(population, weights_asian, k=7906)
black_data = choices(population, weights_black, k=18274)
hispanic_data = choices(population, weights_hispanic, k=14702)
white_data = choices(population, weights_white, k=133165)

values_asian, asian_count = np.unique(asian_data, return_counts=True)
values_black, black_count = np.unique(black_data, return_counts=True)
values_hispanic, hispanic_count = np.unique(hispanic_data, return_counts=True)
values_white, white_count = np.unique(white_data, return_counts=True)

asian_1_count = np.around(asian_count * (FICO['performance']['Asian'].values[1:]))
asian_0_count = np.around(asian_count * (1 - FICO['performance']['Asian'].values[1:]))

asian_1 = []
for index, number in enumerate(values_asian):
    j = 0
    while (j < asian_1_count[index]):
        asian_1 = asian_1 + [number]
        j = j + 1
asian_0 = []
for index, number in enumerate(values_asian):
    j = 0
    while (j < asian_0_count[index]):
        asian_0 = asian_0 + [number]
        j = j + 1

black_1_count = np.around(black_count * (FICO['performance']['Black'].values[:197]))
black_0_count = np.around(black_count * (1 - FICO['performance']['Black'].values[:197]))

black_1 = []
for index, number in enumerate(values_black):
    j = 0
    while (j < black_1_count[index]):
        black_1 = black_1 + [number]
        j = j + 1
black_0 = []
for index, number in enumerate(values_black):
    j = 0
    while (j < black_0_count[index]):
        black_0 = black_0 + [number]
        j = j + 1

hispanic_1_count = np.around(hispanic_count * (FICO['performance']['Hispanic'].values[:197]))
hispanic_0_count = np.around(hispanic_count * (1 - FICO['performance']['Hispanic'].values[:197]))

hispanic_1 = []
for index, number in enumerate(values_hispanic):
    j = 0
    while (j < hispanic_1_count[index]):
        hispanic_1 = hispanic_1 + [number]
        j = j + 1
hispanic_0 = []
for index, number in enumerate(values_hispanic):
    j = 0
    while (j < hispanic_0_count[index]):
        hispanic_0 = hispanic_0 + [number]
        j = j + 1

white_1_count = np.around(white_count * (FICO['performance']['White'].values))
white_0_count = np.around(white_count * (1 - FICO['performance']['White'].values))

white_1 = []
for index, number in enumerate(values_white):
    j = 0
    while (j < white_1_count[index]):
        white_1 = white_1 + [number]
        j = j + 1
white_0 = []
for index, number in enumerate(values_white):
    j = 0
    while (j < white_0_count[index]):
        white_0 = white_0 + [number]
        j = j + 1

# Form two groups White and Nonwhite
# white_1 and white_0
Nonwhite_1 = black_1 + hispanic_1 + asian_1
Nonwhite_0 = black_0 + hispanic_0 + asian_0

# %% [code]
from scipy.stats import beta
fair_constarint = ['single', 'min_cost', 'independence', 'fnr']
fair = 3

min_groups = -0.5
max_groups = 101
reference_quantile_0 = 0.5
reference_quantile_1 = 0.5
batchsize = 1000
exploration_porb_group1 = 1
exploration_porb_group0 = 1

TP_group1 = 0
FP_group1 = 0
FN_group1 = 0
TN_group1 = 0
TP_group0 = 0
FP_group0 = 0
FN_group0 = 0
TN_group0 = 0

TP_oracle_group1 = 0 
FP_oracle_group1 = 0
FN_oracle_group1 = 0
TN_oracle_group1 = 0
TP_oracle_group0 = 0 
FP_oracle_group0 = 0
FN_oracle_group0 = 0
TN_oracle_group0 = 0

a,b1_true_group1,c,d = beta.fit(white_1, floc = min_groups, fscale = max_groups - min_groups)
a,b0_true_group1,c,d = beta.fit(white_0, floc = min_groups, fscale = max_groups - min_groups)
a,b1_true_group0,c,d = beta.fit(Nonwhite_1, floc = min_groups, fscale = max_groups - min_groups)
a,b0_true_group0,c,d = beta.fit(Nonwhite_0, floc = min_groups, fscale = max_groups - min_groups)

b1_group1 = b1_true_group1
b0_group1 = b0_true_group1
b1_group0 = b1_true_group0
b0_group0 = b0_true_group0

# Find the true parameters
x = np.arange(0.01,10,0.01)

def f(alpha):
    return abs(beta.cdf(np.quantile(white_1,reference_quantile_1), alpha, b1_group1, loc=min_groups, scale=max_groups - min_groups) - reference_quantile_1)
a1_true_group1 = np.argmin(f(x))*0.01

def f(alpha):
    return abs(beta.cdf(np.quantile(white_0,reference_quantile_0), alpha, b0_group1, loc=min_groups, scale=max_groups - min_groups) - reference_quantile_0)
a0_true_group1 = np.argmin(f(x))*0.01

def f(alpha):
    return abs(beta.cdf(np.quantile(Nonwhite_1,reference_quantile_1), alpha, b1_group0, loc=min_groups, scale=max_groups - min_groups) - reference_quantile_1)
a1_true_group0 = np.argmin(f(x))*0.01

def f(alpha):
    return abs(beta.cdf(np.quantile(Nonwhite_0,reference_quantile_0), alpha, b0_group0, loc=min_groups, scale=max_groups - min_groups) - reference_quantile_0)
a0_true_group0 = np.argmin(f(x))*0.01

# %% [code]
info = pd.DataFrame(columns = ['True Label','Values','Decision','RP_1_group1','RP_0_group1',
                                      'Classifier_group1','Explore_Prob_group1','RP_1_group0','RP_0_group0',
                                      'Classifier_group0','Explore_Prob_group0','Alpha_1_group1','Alpha_0_group1',
                                       'Alpha_1_group0','Alpha_0_group0','Regret'])


# Assign feature values to the dataframe
info['Values'] = np.concatenate((Nonwhite_1, Nonwhite_0, white_1, white_0))
# Assign true labels to the dataframe
info.loc[0:len(Nonwhite_1),'True Label'] = 1
info.loc[len(Nonwhite_1):(len(Nonwhite_1)+len(Nonwhite_0)),'True Label'] = 0
info.loc[(len(Nonwhite_1)+len(Nonwhite_0)):(len(Nonwhite_1)+len(Nonwhite_0)+len(white_1)),'True Label'] = 1
info.loc[(len(Nonwhite_1)+len(Nonwhite_0)+len(white_1)): ,'True Label'] = 0

# Assign group number to the dataframe
info.loc[0:(len(Nonwhite_1)+len(Nonwhite_0)),'Group Num'] = 0
info.loc[(len(Nonwhite_1)+len(Nonwhite_0)): ,'Group Num'] = 1

# Shuffle the dataframe
info = shuffle(info)
# Resign the index 
info.reset_index(inplace=True, drop=True)

# %% [code]
# Select first (Initial_fit_portion) rows to find initial assumed distribution
Initial_fit_portion = 0.003

First_n_data = info.head(round(Initial_fit_portion*len(info)))
Initial_white1 = First_n_data[(First_n_data["True Label"]==1) & (First_n_data["Group Num"]==1)]["Values"]
Initial_white0 = First_n_data[(First_n_data["True Label"]==0) & (First_n_data["Group Num"]==1)]["Values"]
Initial_nonwhite1 = First_n_data[(First_n_data["True Label"]==1) & (First_n_data["Group Num"]==0)]["Values"]
Initial_nonwhite0 = First_n_data[(First_n_data["True Label"]==0) & (First_n_data["Group Num"]==0)]["Values"]
print (len(Initial_white1), len(Initial_white0), len(Initial_nonwhite1), len(Initial_nonwhite0))

# %% [code]
# Find the initial parameters
x = np.arange(0.01,10,0.01)

def f(alpha):
    return abs(beta.cdf(np.quantile(Initial_white1,reference_quantile_1), alpha, b1_group1, loc=min_groups, scale=max_groups - min_groups) - reference_quantile_1)
a1_init_group1 = np.argmin(f(x))*0.01

def f(alpha):
    return abs(beta.cdf(np.quantile(Initial_white0,reference_quantile_0), alpha, b0_group1, loc=min_groups, scale=max_groups - min_groups) - reference_quantile_0)
a0_init_group1 = np.argmin(f(x))*0.01

def f(alpha):
    return abs(beta.cdf(np.quantile(Initial_nonwhite1,reference_quantile_1), alpha, b1_group0, loc=min_groups, scale=max_groups - min_groups) - reference_quantile_1)
a1_init_group0 = np.argmin(f(x))*0.01

def f(alpha):
    return abs(beta.cdf(np.quantile(Initial_nonwhite0,reference_quantile_0), alpha, b0_group0, loc=min_groups, scale=max_groups - min_groups) - reference_quantile_0)
a0_init_group0 = np.argmin(f(x))*0.01

a1_group1 = a1_init_group1
a0_group1 = a0_init_group1
a1_group0 = a1_init_group0
a0_group0 = a0_init_group0
info = info.tail(round((1-Initial_fit_portion)*len(info)))
# Resign the index 
info.reset_index(inplace=True, drop=True)

# %% [code]
data_1_group1 = Initial_white1
data_0_group1 = Initial_white0
data_1_group0 = Initial_nonwhite1
data_0_group0 = Initial_nonwhite0

data_1_group1.reset_index(inplace=True, drop=True)
data_0_group1.reset_index(inplace=True, drop=True)
data_1_group0.reset_index(inplace=True, drop=True)
data_0_group0.reset_index(inplace=True, drop=True)

# %% [code]
# Find the confusion matrix given threshold
def CM(Y_test,y_pred,threshold):
    # The Confusion Matrix given a threshold
    y_pred = np.where(y_pred>threshold,1,0)
    cm = pd.DataFrame(confusion_matrix(Y_test,y_pred))
    cm.rename(columns={0:'Pred_neg', 1:'Pred_pos'},
         index = {0:'Actual_neg',1:'Actual_pos'},inplace=True)
    cm['Total'] = cm['Pred_neg'] + cm['Pred_pos'] 
    rowsum = cm.sum()
    rowsum.name = 'Total'
    cm = cm.append(rowsum.transpose())
    
    # TP/TN/FP/FN/TPR/FPR
    P = cm['Total']['Actual_pos']
    N = cm['Total']['Actual_neg']
    TP = cm['Pred_pos']['Actual_pos']
    TN = cm['Pred_neg']['Actual_neg']
    FP = cm['Pred_pos']['Actual_neg']
    FN = cm['Pred_neg']['Actual_pos']
    TPR = np.round(TP/P,2)
    FPR = np.round(FP/N,2)
    return(cm, TPR, FPR)

# Define the cost matrix
COST_MATRIX = [[0, -3/6],
               [0,  3/6]]

# %% [code]
# Find initial fair classifier for the inital training set

# Find the parameters proportions, base_rate and base_rates 
proportions = {'White': (len(data_1_group1) + len(data_0_group1))/(len(data_1_group1) + len(data_0_group1) + len(data_1_group0) + len(data_0_group0)), 
               'Non-White': 1 - (len(data_1_group1) + len(data_0_group1))/(len(data_1_group1) + len(data_0_group1) + len(data_1_group0) + len(data_0_group0))}

proportions = {'White': (len(white_1) + len(white_0))/(len(white_1) + len(white_0) + len(Nonwhite_1) + len(Nonwhite_0)), 
               'Non-White': 1 - (len(white_1) + len(white_0))/(len(white_1) + len(white_0) + len(Nonwhite_1) + len(Nonwhite_0))}

base_rate = (len(data_1_group1) + len(data_1_group0))/(len(data_1_group1) + len(data_0_group1) + len(data_1_group0) + len(data_0_group0))
d = {'White': len(data_1_group1)/(len(data_1_group1) + len(data_0_group1)), 'Non-White': len(data_1_group0)/(len(data_1_group0) + len(data_0_group0))}
base_rates = pd.Series(data = d, index = ['White','Non-White'])

# Find the ROC curve by construting confusion matrix 
yprob1 = np.append(data_1_group1, data_0_group1)
yprob0 = np.append(data_1_group0, data_0_group0)
  
TPR1 = []
FPR1 = []
threshold1 = [] 
for threshold in range(200,-1,-1):
    cm, TPR, FPR = CM(np.append(np.ones(len(data_1_group1)),np.zeros(len(data_0_group1))),yprob1,threshold/2)
    TPR1 = TPR1 + [TPR]
    FPR1 = FPR1 + [FPR]
    threshold1 = threshold1 + [threshold/2]
TPR1 = np.array(TPR1)
FPR1 = np.array(FPR1)
threshold1 = np.array(threshold1)

TPR0 = []
FPR0 = []
threshold0 = []
for threshold in range(200,-1,-1):
    cm, TPR, FPR = CM(np.append(np.ones(len(data_1_group0)),np.zeros(len(data_0_group0))),yprob0,threshold/2)
    TPR0 = TPR0 + [TPR]
    FPR0 = FPR0 + [FPR]
    threshold0 = threshold0 + [threshold/2]
TPR0 = np.array(TPR0)
FPR0 = np.array(FPR0)
threshold0 = np.array(threshold0)

# Find the parameter rocs 
rocs = {'White': (FPR1, TPR1, threshold1), 'Non-White': (FPR0, TPR0,threshold0)}

# Find the initial fairness classifier_1 and classifier_2 
thresholds_data = find_thresholds(rocs, proportions, base_rate, base_rates, COST_MATRIX)
if fair != 0:
    classifier_group1 = thresholds_data[fair_constarint[fair]][0]['White'] 
    classifier_group0 = thresholds_data[fair_constarint[fair]][0]['Non-White'] 
else: 
    classifier_group1 = thresholds_data[fair_constarint[fair]][0] 
    classifier_group0 = thresholds_data[fair_constarint[fair]][0] 
    
print ("Initial classifier for White group is ", classifier_group1)
print ("Initial classifier for Nonwhite group is ", classifier_group0)

# %% [code]
# Find oracle fair classifier for the entire data

# Find the parameters proportions, base_rate and base_rates 
proportions = {'White': (len(white_1) + len(white_0))/(len(white_1) + len(white_0) + len(Nonwhite_1) + len(Nonwhite_0)), 
               'Non-White': 1 - (len(white_1) + len(white_0))/(len(white_1) + len(white_0) + len(Nonwhite_1) + len(Nonwhite_0))}
base_rate = (len(white_1) + len(Nonwhite_1))/(len(white_1) + len(white_0) + len(Nonwhite_1) + len(Nonwhite_0))
d = {'White': len(white_1)/(len(white_1) + len(white_0)), 'Non-White': len(Nonwhite_1)/(len(Nonwhite_1) + len(Nonwhite_0))}
base_rates = pd.Series(data = d, index = ['White','Non-White'])

# Find the ROC curve by construting confusion matrix 
yprob1 = np.append(white_1, white_0)
yprob0 = np.append(Nonwhite_1, Nonwhite_0)
  
TPR1 = []
FPR1 = []
threshold1 = []
for threshold in range(201,0,-1):
    cm, TPR, FPR = CM(np.append(np.ones(len(white_1)),np.zeros(len(white_0))),yprob1,threshold/2)
    TPR1 = TPR1 + [TPR]
    FPR1 = FPR1 + [FPR]
    threshold1 = threshold1 + [threshold/2]
TPR1 = np.array(TPR1)
FPR1 = np.array(FPR1)
threshold1 = np.array(threshold1)

TPR0 = []
FPR0 = []
threshold0 = []
for threshold in range(201,0,-1):
    cm, TPR, FPR = CM(np.append(np.ones(len(Nonwhite_1)),np.zeros(len(Nonwhite_0))),yprob0,threshold/2)
    TPR0 = TPR0 + [TPR]
    FPR0 = FPR0 + [FPR]
    threshold0 = threshold0 + [threshold/2]
TPR0 = np.array(TPR0)
FPR0 = np.array(FPR0)
threshold0 = np.array(threshold0)

# Find the parameter rocs 
rocs = {'White': (FPR1, TPR1, threshold1), 'Non-White': (FPR0, TPR0, threshold0)}

# Find the initial fairness classifier_1 and classifier_2 
thresholds_data = find_thresholds(rocs, proportions, base_rate, base_rates, COST_MATRIX)

if fair != 0:
    classifier_oracle_value_1 = thresholds_data[fair_constarint[fair]][0]['White'] 
    classifier_oracle_value_0 = thresholds_data[fair_constarint[fair]][0]['Non-White'] 
else: 
    classifier_oracle_value_1 = thresholds_data[fair_constarint[fair]][0] 
    classifier_oracle_value_0 = thresholds_data[fair_constarint[fair]][0] 

print ("Oracle classifier for White group is ", classifier_oracle_value_1)
print ("Oracle classifier for Nonwhite group is ", classifier_oracle_value_0)

# %% [code]
# Find the LB_1 and UB_1 (Using alpha = 60 for label 0 and median for label 1)
temp = 2*beta.cdf(beta.ppf(reference_quantile_0,a0_group1,b0_group1,loc=min_groups, scale=max_groups - min_groups),a0_group1,b0_group1,loc=min_groups, scale=max_groups - min_groups) -\
            beta.cdf(classifier_group1,a0_group1,b0_group1,loc=min_groups, scale=max_groups - min_groups)
LB_group1 = max(0, float(beta.ppf(temp,a0_group1,b0_group1,loc=min_groups, scale=max_groups - min_groups)))

temp = 2*beta.cdf(beta.ppf(reference_quantile_1,a1_group1,b1_group1,loc=min_groups, scale=max_groups - min_groups),a1_group1,b1_group1,loc=min_groups, scale=max_groups - min_groups) -\
            beta.cdf(LB_group1,a1_group1,b1_group1,loc=min_groups, scale=max_groups - min_groups)
UB_group1 = min(100, float(beta.ppf(temp,a1_group1,b1_group1,loc=min_groups, scale=max_groups - min_groups)))

# Find the LB_0 and UB_0 (Using alpha = 60 for label 0 and median for label 1)
temp = 2*beta.cdf(beta.ppf(reference_quantile_0,a0_group0,b0_group0,loc=min_groups, scale=max_groups - min_groups),a0_group0,b0_group0,loc=min_groups, scale=max_groups - min_groups) -\
            beta.cdf(classifier_group0,a0_group0,b0_group0,loc=min_groups, scale=max_groups - min_groups)
LB_group0 = max(0, float(beta.ppf(temp,a0_group0,b0_group0,loc=min_groups, scale=max_groups - min_groups)))

temp = 2*beta.cdf(beta.ppf(reference_quantile_1,a1_group0,b1_group0,loc=min_groups, scale=max_groups - min_groups),a1_group0,b1_group0,loc=min_groups, scale=max_groups - min_groups) -\
            beta.cdf(LB_group0,a1_group0,b1_group0,loc=min_groups, scale=max_groups - min_groups)
UB_group0 = min(100, float(beta.ppf(temp,a1_group0,b1_group0,loc=min_groups, scale=max_groups - min_groups)))
                
print (LB_group1, classifier_group1, UB_group1, LB_group0, classifier_group0, UB_group0)

# %% [code]
generating_samples_group1 = 0
generating_samples_group0 = 0
true_pop_prob_group1 = 0.5
true_pop_prob_group0 = 0.5
label1_group1 = beta.rvs(a1_true_group1, b1_true_group1, loc=min_groups, scale=max_groups - min_groups, 
                  size=int(generating_samples_group1*(1-true_pop_prob_group1)))
label0_group1 = beta.rvs(a0_true_group1, b0_true_group1, loc=min_groups, scale=max_groups - min_groups, 
                  size=int(generating_samples_group1*true_pop_prob_group1))
label1_group0 = beta.rvs(a1_true_group0, b1_true_group0, loc=min_groups, scale=max_groups - min_groups, 
                  size=int(generating_samples_group0*(1-true_pop_prob_group0)))
label0_group0 = beta.rvs(a0_true_group0, b0_true_group0, loc=min_groups, scale=max_groups - min_groups, 
                  size=int(generating_samples_group0*true_pop_prob_group0))

additional_data = pd.DataFrame(columns = ["Values","True Label","Group Num"])
additional_data['Values'] = np.hstack((label1_group1, label0_group1, label1_group0, label0_group0))
additional_data['True Label'] = np.hstack((np.ones(len(label1_group1)), np.zeros(len(label0_group1)), np.ones(len(label1_group0)), np.zeros(len(label0_group0))))
additional_data['Group Num'] = np.hstack((np.ones(len(label1_group1)+len(label0_group1)), np.zeros(len(label1_group0)+len(label0_group0)) ))
additional_data = shuffle(additional_data)
# Resign the index 
additional_data.reset_index(inplace=True, drop=True)

m = pd.DataFrame(columns = ['True Label','Values','Decision','RP_1_group1','RP_0_group1',
                                      'Classifier_group1','Explore_Prob_group1','RP_1_group0','RP_0_group0',
                                      'Classifier_group0','Explore_Prob_group0','Alpha_1_group1','Alpha_0_group1',
                                       'Alpha_1_group0','Alpha_0_group0','Regret','Race'])
m[["Values","True Label","Group Num"]]= pd.concat([info[["Values","True Label","Group Num"]], additional_data], ignore_index=True)
info = m 


# %% [code]
i = 0
# Create loop for updating
while (i <= len(info)-1):
    
    data_1_trun_group1 = []
    data_0_trun_group1 = []
    data_1_trun_group0 = []
    data_0_trun_group0 = []
    
    # find quantile of reference point including label 0 tail for advantage group
    portion_right0_group1 = (beta.sf(beta.ppf(reference_quantile_0,a0_group1,b0_group1,loc=min_groups, scale=max_groups - min_groups),
                                    a0_group1,b0_group1,loc=min_groups, scale=max_groups - min_groups)
                     /beta.sf(LB_group1,a0_group1,b0_group1,loc=min_groups, scale=max_groups - min_groups))
    portion_left0_group1 = 1 - portion_right0_group1
    
    portion_right1_group1 = (beta.sf(beta.ppf(reference_quantile_1,a1_group1,b1_group1,loc=min_groups, scale=max_groups - min_groups),
                                    a1_group1,b1_group1,loc=min_groups, scale=max_groups - min_groups)
                     /beta.sf(LB_group1,a1_group1,b1_group1,loc=min_groups, scale=max_groups - min_groups))
    portion_left1_group1 = 1 - portion_right1_group1
    
    # find quantile of reference point including label 0 tail for disadvantage group
    portion_right0_group0 = (beta.sf(beta.ppf(reference_quantile_0,a0_group0,b0_group0,loc=min_groups, scale=max_groups - min_groups),
                                    a0_group0,b0_group0,loc=min_groups, scale=max_groups - min_groups)
                     /beta.sf(LB_group0,a0_group0,b0_group0,loc=min_groups, scale=max_groups - min_groups))
    portion_left0_group0 = 1 - portion_right0_group0
    
    portion_right1_group0 = (beta.sf(beta.ppf(reference_quantile_1,a1_group0,b1_group0,loc=min_groups, scale=max_groups - min_groups),
                                    a1_group0,b1_group0,loc=min_groups, scale=max_groups - min_groups)
                     /beta.sf(LB_group0,a1_group0,b1_group0,loc=min_groups, scale=max_groups - min_groups))
    portion_left1_group0 = 1 - portion_right1_group0
    
    k1_group1 = len(data_1_trun_group1)
    k0_group1 = len(data_0_trun_group1)
    k1_group0 = len(data_1_trun_group0)
    k0_group0 = len(data_0_trun_group0)
    
    #loop into each batch
    while ((min(k1_group1, k0_group1, k1_group0, k0_group0) < batchsize) & (i <= len(info)-1)):
        
        if info.loc[i,'Group Num'] == 1:
        
            # Make decisions
            if (info.loc[i,'Values'] >= classifier_group1) & (info.loc[i,'Values']<=UB_group1):
                info.loc[i,'Decision'] = 1
            elif (info.loc[i,'Values'] < classifier_group1) & (info.loc[i,'Values']>=LB_group1) & (np.random.uniform(size=1)<=exploration_porb_group1):
                info.loc[i,'Decision'] = 1
            elif (info.loc[i,'Values'] > classifier_group1) & (info.loc[i,'Values']>UB_group1):
                info.loc[i,'Decision'] = 1
            elif (info.loc[i,'Values'] < classifier_group1) & (info.loc[i,'Values']<LB_group1):
                info.loc[i,'Decision'] = 3
            else:
                info.loc[i,'Decision'] = 0  

            # Record confusion matrix
            if (info.loc[i,'True Label']==1) & ((info.loc[i,'Decision']==1) or (info.loc[i,'Decision']==2)):
                TP_group1 += 1
            elif (info.loc[i,'True Label']==1) & ((info.loc[i,'Decision']==0) or (info.loc[i,'Decision']==3)):
                FN_group1 += 1
            elif (info.loc[i,'True Label']==0) & ((info.loc[i,'Decision']==0) or (info.loc[i,'Decision']==3)):
                TN_group1 += 1
            else:
                FP_group1 += 1

            # Record oracle matrix
            if (info.loc[i,'Values'] >= classifier_oracle_value_1) & (info.loc[i,'True Label']==1):
                TP_oracle_group1 += 1
            elif (info.loc[i,'Values'] >= classifier_oracle_value_1) & (info.loc[i,'True Label']==0):
                FP_oracle_group1 += 1
            elif (info.loc[i,'Values'] < classifier_oracle_value_1) & (info.loc[i,'True Label']==1):
                FN_oracle_group1 += 1
            else:
                TN_oracle_group1 += 1


            # Record label 1 information for updating
            if (info.loc[i,'True Label']==1) & ((info.loc[i,'Decision']==1) or (info.loc[i,'Decision']==2)):
                data_1_group1 = np.append(data_1_group1, info.loc[i,'Values'])
                if (((info.loc[i,'Values'] <= classifier_group1) & (info.loc[i,'Decision']==1)) or ((info.loc[i,'Values'] >= classifier_group1) & (info.loc[i,'Decision']==1) & (np.random.uniform(size=1)<=exploration_porb_group1))):
                    data_1_trun_group1 = np.append(data_1_trun_group1, info.loc[i,'Values'])
            else:
                data_1_group1 = data_1_group1 
                data_1_trun_group1 = data_1_trun_group1


            # Record label 0 information for updating
            if (info.loc[i,'True Label']==0) & ((info.loc[i,'Decision']==1) or (info.loc[i,'Decision']==2)):
                data_0_group1 = np.append(data_0_group1, info.loc[i,'Values'])
                if (((info.loc[i,'Values'] <= classifier_group1) & (info.loc[i,'Decision']==1))
                    or ((info.loc[i,'Values'] >= classifier_group1) & (np.random.uniform(size=1)<=exploration_porb_group1))):
                    data_0_trun_group1 = np.append(data_0_trun_group1, info.loc[i,'Values'])
            else:
                data_0_group1 = data_0_group1 
                data_0_trun_group1 = data_0_trun_group1
       
        else: # for non-white group
            
            # Make decisions
            if (info.loc[i,'Values'] >= classifier_group0) & (info.loc[i,'Values']<=UB_group0):
                info.loc[i,'Decision'] = 1
            elif (info.loc[i,'Values'] < classifier_group0) & (info.loc[i,'Values']>=LB_group0) & (np.random.uniform(size=1)<=exploration_porb_group0):
                info.loc[i,'Decision'] = 1
            elif (info.loc[i,'Values'] > classifier_group0) & (info.loc[i,'Values']>UB_group0):
                info.loc[i,'Decision'] = 1
            elif (info.loc[i,'Values'] < classifier_group0) & (info.loc[i,'Values']<LB_group0):
                info.loc[i,'Decision'] = 3
            else:
                info.loc[i,'Decision'] = 0  

            # Record confusion matrix
            if (info.loc[i,'True Label']==1) & ((info.loc[i,'Decision']==1) or (info.loc[i,'Decision']==2)):
                TP_group0 += 1
            elif (info.loc[i,'True Label']==1) & ((info.loc[i,'Decision']==0) or (info.loc[i,'Decision']==3)):
                FN_group0 += 1
            elif (info.loc[i,'True Label']==0) & ((info.loc[i,'Decision']==0) or (info.loc[i,'Decision']==3)):
                TN_group0 += 1
            else:
                FP_group0 += 1

            # Record oracle matrix
            if (info.loc[i,'Values'] >= classifier_oracle_value_0) & (info.loc[i,'True Label']==1):
                TP_oracle_group0 += 1
            elif (info.loc[i,'Values'] >= classifier_oracle_value_0) & (info.loc[i,'True Label']==0):
                FP_oracle_group0 += 1
            elif (info.loc[i,'Values'] < classifier_oracle_value_0) & (info.loc[i,'True Label']==1):
                FN_oracle_group0 += 1
            else:
                TN_oracle_group0 += 1


            # Record label 1 information for updating
            if (info.loc[i,'True Label']==1) & ((info.loc[i,'Decision']==1) or (info.loc[i,'Decision']==2)):
                data_1_group0 = np.append(data_1_group0, info.loc[i,'Values'])
                if (((info.loc[i,'Values'] <= classifier_group0) & (info.loc[i,'Decision']==1)) or ((info.loc[i,'Values'] >= classifier_group0) & (info.loc[i,'Decision']==1) & (np.random.uniform(size=1)<=exploration_porb_group0))):
                    data_1_trun_group0 = np.append(data_1_trun_group0, info.loc[i,'Values'])
            else:
                data_1_group0 = data_1_group0 
                data_1_trun_group0 = data_1_trun_group0


            # Record label 0 information for updating
            if (info.loc[i,'True Label']==0) & ((info.loc[i,'Decision']==1) or (info.loc[i,'Decision']==2)):
                data_0_group0 = np.append(data_0_group0, info.loc[i,'Values'])
                if (((info.loc[i,'Values'] <= classifier_group0) & (info.loc[i,'Decision']==1))
                    or ((info.loc[i,'Values'] >= classifier_group0) & (np.random.uniform(size=1)<=exploration_porb_group0))):
                    data_0_trun_group0 = np.append(data_0_trun_group0, info.loc[i,'Values'])
            else:
                data_0_group0 = data_0_group0 
                data_0_trun_group0 = data_0_trun_group0
            
        k1_group1 = len(data_1_trun_group1)
        k0_group1 = len(data_0_trun_group1)
        k1_group0 = len(data_1_trun_group0)
        k0_group0 = len(data_0_trun_group0)
        i = i + 1
    
    print (k1_group1, k0_group1, k1_group0, k0_group0)
    # Record new mean value/RP and classifier
    info.loc[i-1,'RP_1_group1'] = np.quantile(data_1_trun_group1, portion_left1_group1)  #np.median(data_1_trun_group1) #np.quantile(data_1_trun_group1, portion_left1_group1) 
    info.loc[i-1,'RP_0_group1'] =  np.quantile(data_0_trun_group1, portion_left0_group1) #np.median(data_0_trun_group1)  #np.quantile(data_0_trun_group1, portion_left0_group1)
    info.loc[i-1,'Classifier_group1'] = classifier_group1
    info.loc[i-1,'Regret'] = (FP_group1 + FN_group1)-(FP_oracle_group1 + FN_oracle_group1)
    info.loc[i-1,'Explore_Prob_group1'] = exploration_porb_group1
    
    info.loc[i-1,'RP_1_group0'] = np.quantile(data_1_trun_group0, portion_left1_group0) #np.median(data_1_trun_group0)
    info.loc[i-1,'RP_0_group0'] =  np.quantile(data_0_trun_group0, portion_left0_group0) #np.median(data_0_trun_group0) 
    info.loc[i-1,'Classifier_group0'] = classifier_group0
    info.loc[i-1,'Explore_Prob_group0'] = exploration_porb_group0
    
    x = np.arange(0.01,10,0.01)
    # Reassign new values to parameters
    def f(alpha):
        return abs(beta.cdf(info.loc[i-1,'RP_1_group1'], alpha, b1_group1, loc=min_groups, scale=max_groups - min_groups) - reference_quantile_1)
    info.loc[i-1,'Alpha_1_group1'] = np.argmin(f(x))*0.01
    
    def f(alpha):
        return abs(beta.cdf(info.loc[i-1,'RP_0_group1'], alpha, b0_group1, loc=min_groups, scale=max_groups - min_groups) - reference_quantile_0)
    info.loc[i-1,'Alpha_0_group1'] = np.argmin(f(x))*0.01
    
    def f(alpha):
        return abs(beta.cdf(info.loc[i-1,'RP_1_group0'], alpha, b1_group0, loc=min_groups, scale=max_groups - min_groups) - reference_quantile_1)
    info.loc[i-1,'Alpha_1_group0'] = np.argmin(f(x))*0.01
    
    def f(alpha):
        return abs(beta.cdf(info.loc[i-1,'RP_0_group0'], alpha, b0_group0, loc=min_groups, scale=max_groups - min_groups) - reference_quantile_0)
    info.loc[i-1,'Alpha_0_group0'] = np.argmin(f(x))*0.01
    
    a1_group1 = info.loc[i-1,'Alpha_1_group1']
    a0_group1 = info.loc[i-1,'Alpha_0_group1']
    a1_group0 = info.loc[i-1,'Alpha_1_group0']
    a0_group0 = info.loc[i-1,'Alpha_0_group0']
    
    # Find the parameters proportions, base_rate and base_rates 
    proportions = {'White': (len(data_1_group1) + len(data_0_group1))/(len(data_1_group1) + len(data_0_group1) + len(data_1_group0) + len(data_0_group0)), 
                   'Non-White': 1 - (len(data_1_group1) + len(data_0_group1))/(len(data_1_group1) + len(data_0_group1) + len(data_1_group0) + len(data_0_group0))}
    base_rate = (len(data_1_group1) + len(data_1_group0))/(len(data_1_group1) + len(data_0_group1) + len(data_1_group0) + len(data_0_group0))
    d = {'White': len(data_1_group1)/(len(data_1_group1) + len(data_0_group1)), 'Non-White': len(data_1_group0)/(len(data_1_group0) + len(data_0_group0))}
    base_rates = pd.Series(data = d, index = ['White','Non-White'])

    # Find the ROC curve by construting confusion matrix 
    yprob1 = np.append(data_1_group1, data_0_group1)
    yprob0 = np.append(data_1_group0, data_0_group0)

    TPR1 = []
    FPR1 = []
    threshold1 = [] 
    for threshold in range(201,0,-1):
        cm, TPR, FPR = CM(np.append(np.ones(len(data_1_group1)),np.zeros(len(data_0_group1))),yprob1,threshold/2)
        TPR1 = TPR1 + [TPR]
        FPR1 = FPR1 + [FPR]
        threshold1 = threshold1 + [threshold/2]
    TPR1 = np.array(TPR1)
    FPR1 = np.array(FPR1)
    threshold1 = np.array(threshold1)

    TPR0 = []
    FPR0 = []
    threshold0 = []
    for threshold in range(201,0,-1):
        cm, TPR, FPR = CM(np.append(np.ones(len(data_1_group0)),np.zeros(len(data_0_group0))),yprob0,threshold/2)
        TPR0 = TPR0 + [TPR]
        FPR0 = FPR0 + [FPR]
        threshold0 = threshold0 + [threshold/2]
    TPR0 = np.array(TPR0)
    FPR0 = np.array(FPR0)
    threshold0 = np.array(threshold0)

    # Find the parameter rocs 
    rocs = {'White': (FPR1, TPR1, threshold1), 'Non-White': (FPR0, TPR0,threshold0)}

    # Find the initial fairness classifier_1 and classifier_2 
    thresholds_data = find_thresholds(rocs, proportions, base_rate, base_rates, COST_MATRIX)
    if fair != 0:
        classifier_group1 = thresholds_data[fair_constarint[fair]][0]['White'] 
        classifier_group0 = thresholds_data[fair_constarint[fair]][0]['Non-White'] 
    else: 
        classifier_group1 = thresholds_data[fair_constarint[fair]][0] 
        classifier_group0 = thresholds_data[fair_constarint[fair]][0] 
    

    # Update UB and LB for advantage group
    temp = 2*beta.cdf(beta.ppf(reference_quantile_0,a0_group1,b0_group1,loc=min_groups, scale=max_groups - min_groups),a0_group1,b0_group1,loc=min_groups, scale=max_groups - min_groups) -\
            beta.cdf(classifier_group1,a0_group1,b0_group1,loc=min_groups, scale=max_groups - min_groups)
    LB_group1 = max(0, float(beta.ppf(temp,a0_group1,b0_group1,loc=min_groups, scale=max_groups - min_groups)))

    temp = 2*beta.cdf(beta.ppf(reference_quantile_1,a1_group1,b1_group1,loc=min_groups, scale=max_groups - min_groups),a1_group1,b1_group1,loc=min_groups, scale=max_groups - min_groups) -\
            beta.cdf(LB_group1,a1_group1,b1_group1,loc=min_groups, scale=max_groups - min_groups)
    UB_group1 = min(100, float(beta.ppf(temp,a1_group1,b1_group1,loc=min_groups, scale=max_groups - min_groups)))
    
    # Update UB and LB for disadvantage group
    temp = 2*beta.cdf(beta.ppf(reference_quantile_0,a0_group0,b0_group0,loc=min_groups, scale=max_groups - min_groups),a0_group0,b0_group0,loc=min_groups, scale=max_groups - min_groups) -\
            beta.cdf(classifier_group0,a0_group0,b0_group0,loc=min_groups, scale=max_groups - min_groups)
    LB_group0 = max(0, float(beta.ppf(temp,a0_group0,b0_group0,loc=min_groups, scale=max_groups - min_groups)))

    temp = 2*beta.cdf(beta.ppf(reference_quantile_1,a1_group0,b1_group0,loc=min_groups, scale=max_groups - min_groups),a1_group0,b1_group0,loc=min_groups, scale=max_groups - min_groups) -\
            beta.cdf(LB_group0,a1_group0,b1_group0,loc=min_groups, scale=max_groups - min_groups)
    UB_group0 = min(100, float(beta.ppf(temp,a1_group0,b1_group0,loc=min_groups, scale=max_groups - min_groups)))
    
    # Update exploration probability for advantage group
    theoretical_value_group1 = beta.sf(classifier_group1,a0_group1,b0_group1,loc=min_groups, scale=max_groups - min_groups) \
                                /beta.sf(LB_group1,a0_group1,b0_group1,loc=min_groups, scale=max_groups - min_groups)
    experiment_value_group1 = len(data_0_trun_group1[data_0_trun_group1>=classifier_group1])/len(data_0_trun_group1[data_0_trun_group1>=LB_group1])
    diff_group1 = abs(theoretical_value_group1 - experiment_value_group1)
    exploration_porb_group1 = 1 - 0.1*(i//(len(info)/10)) 
    
    # Update exploration probability for disadvantage group
    theoretical_value_group0 = beta.sf(classifier_group0,a0_group0,b0_group0,loc=min_groups, scale=max_groups - min_groups) \
                                /beta.sf(LB_group0,a0_group0,b0_group0,loc=min_groups, scale=max_groups - min_groups)
    experiment_value_group0 = len(data_0_trun_group0[data_0_trun_group0>=classifier_group0])/len(data_0_trun_group0[data_0_trun_group0>=LB_group0])
    diff_group0 = abs(theoretical_value_group0 - experiment_value_group0)
    exploration_porb_group0 = 1 - 0.1*(i//(len(info)/10)) 

# %% [code]
initial_information = []
initial_information.insert(0, {'True Label':'NA','Values':'NA','Decision':'NA','RP_1_group1':'NA','RP_0_group1':'NA',
                                      'Classifier_group1':'NA','Explore_Prob_group1':1,'RP_1_group0':'NA','RP_0_group0':'NA',
                                      'Classifier_group0':'NA','Explore_Prob_group0':1, 'Alpha_1_group1': a1_init_group1,
                                      'Alpha_0_group1':a0_init_group1,'Alpha_1_group0':a1_init_group0,
                                      'Alpha_0_group0': a0_init_group0, 'Regret':0, 'Race':'NA'})
info = pd.concat([pd.DataFrame(initial_information), info], ignore_index=True)

# %% [code]
plt.plot(info['Alpha_1_group1'].dropna().index[:len(info['Alpha_1_group1'].dropna())-1],info['Alpha_1_group1'].dropna()[:len(info['Alpha_1_group1'].dropna())-1],
         lw=2,color='red',marker='^',ms=10, markevery=1,markerfacecolor='red')
plt.plot(info['Alpha_0_group1'].dropna().index[:len(info['Alpha_1_group1'].dropna())-1],info['Alpha_0_group1'].dropna()[:len(info['Alpha_0_group1'].dropna())-1],
         lw=2,color='green', marker='o',ms=10, markevery=1,markerfacecolor='green')
plt.plot(info['Alpha_1_group0'].dropna().index[:len(info['Alpha_1_group1'].dropna())-1],info['Alpha_1_group0'].dropna()[:len(info['Alpha_1_group0'].dropna())-1],
         lw=2,color='blue',marker='^',ms=10, markevery=1,markerfacecolor='blue')
plt.plot(info['Alpha_0_group0'].dropna().index[:len(info['Alpha_1_group1'].dropna())-1],info['Alpha_0_group0'].dropna()[:len(info['Alpha_0_group0'].dropna())-1],
         lw=2,color='black', marker='o',ms=10, markevery=1,markerfacecolor='black')
plt.legend(['Alpha_1_groupA','Alpha_0_groupA','Alpha_1_groupB','Alpha_0_groupB'],fontsize=10)
plt.xlabel('Number of Samples Observed', fontsize=20)
plt.ylabel('Alpha Estimates', fontsize=20)
plt.show()


plt.plot(info['Alpha_1_group1'].dropna().index[:len(info['Alpha_1_group1'].dropna())-1],info['Alpha_1_group1'].dropna()[:len(info['Alpha_1_group1'].dropna())-1]-a1_true_group1,
         lw=2,color='red',marker='^',ms=10, markevery=1,markerfacecolor='red')
plt.plot(info['Alpha_1_group1'].dropna().index[:len(info['Alpha_0_group1'].dropna())-1],info['Alpha_0_group1'].dropna()[:len(info['Alpha_0_group1'].dropna())-1]-a0_true_group1,
         lw=2,color='green', marker='o',ms=10, markevery=1,markerfacecolor='green')
plt.plot(info['Alpha_1_group1'].dropna().index[:len(info['Alpha_1_group0'].dropna())-1],info['Alpha_1_group0'].dropna()[:len(info['Alpha_1_group0'].dropna())-1]-a1_true_group0,
         lw=2,color='blue',marker='^',ms=10, markevery=1,markerfacecolor='blue')
plt.plot(info['Alpha_1_group1'].dropna().index[:len(info['Alpha_0_group0'].dropna())-1],info['Alpha_0_group0'].dropna()[:len(info['Alpha_0_group0'].dropna())-1]-a0_true_group0,
         lw=2,color='black', marker='o',ms=10, markevery=1,markerfacecolor='black')
plt.legend(['Alpha_1_groupA','Alpha_0_groupA','Alpha_1_groupB','Alpha_0_groupB'],fontsize=10)
plt.xlabel('Number of Samples Observed', fontsize=20)
plt.ylabel('Differences w.r.t True', fontsize=20)
plt.show()


# %% [code]
plt.plot(info['Explore_Prob_group1'].dropna().index[:len(info['Explore_Prob_group1'].dropna())],info['Explore_Prob_group1'].dropna()[:len(info['Explore_Prob_group1'].dropna())],
         lw=2,color='red',marker='^',ms=10, markevery=1,markerfacecolor='red')
plt.plot(info['Explore_Prob_group0'].dropna().index[:len(info['Explore_Prob_group0'].dropna())],info['Explore_Prob_group0'].dropna()[:len(info['Explore_Prob_group0'].dropna())],
         lw=2,color='green', marker='o',ms=10, markevery=1,markerfacecolor='green')
plt.legend(['Explore_Prob_groupA','Explore_Prob_groupB'],fontsize=15)
plt.xlabel('Number of Samples Observed', fontsize=20)
plt.ylabel('Alpha Estimates for GroupB', fontsize=20)
plt.show()

# %% [code]
data = [info['Alpha_1_group1'].dropna(), info['Alpha_0_group1'].dropna(),info['Alpha_1_group0'].dropna(),info['Alpha_0_group0'].dropna()]
df = pd.DataFrame(data=data)
df['True'] = [a1_true_group1,a0_true_group1,a1_true_group0,a0_true_group0]
df.insert(0,'Total',[len(white_1),len(white_0),len(Nonwhite_1),len(Nonwhite_0)])
print (df)

# %% [code]
info.to_csv('FICO.csv')

# %% [code]
