# Supplementary material
Source: ML conference proceedings conference paper supplement (https://proceedings.neurips.cc/paper_files/paper/2022/hash/0a166a3d98720697d9028bbe592fa177-Abstract.html)
Supplement: Supplementary file 1 [file 0a166a3d98720697d9028bbe592fa177-Supplemental-Conference.zip › supplement/Code/Beta_Experiment.ipynb]

# %% [markdown]
# Adaptive Data Debiasing through Bounded Exploraiton and Fairness

This code is under the Beta 1 group no fairness setting

# %% [markdown]
Define true, initial, and other hyper-parameters 

# %% [code]
from sklearn.linear_model import LogisticRegression
from sklearn.utils import shuffle
import numpy as np
import pandas as pd
from scipy.stats import beta
import matplotlib.pyplot as plt

# Defining True Parameters for group 1 and 0
a1_true_group1 = 5           #f1_group_1 (5, 3)
a0_true_group1 = 3           #f0_group_1 (3, 5)
b1_true_group1 = 3
b0_true_group1 = 5

min_1_group1 = 4
max_1_group1 = 12
min_0_group1 = 2
max_0_group1 = 10

# Defining Initial Assumed Parameters
a1_init_group1 = 2           # (2,3)
a0_init_group1 = 5           # (5,5)
b1_init_group1 = b1_true_group1
b0_init_group1 = b0_true_group1

a1_group1=a1_init_group1
b1_group1=b1_init_group1
a0_group1=a0_init_group1
b0_group1=b0_init_group1

true_pop_prob_group1 = 0.5
exploration_porb_group1 = 1
generating_samples_group1 = 150000
existing_1_customers_group1 = 10000
existing_0_customers_group1 = 10000
batchsize = 4500
reference_quantile = 0.5


TP_group1 = 0
FP_group1 = 0
FN_group1 = 0
TN_group1 = 0
TP_oracle_group1 = 0 
FP_oracle_group1 = 0
FN_oracle_group1 = 0
TN_oracle_group1 = 0

# %% [markdown]
Generate initial and incoming data and forget initial/true parameters defined above. From now on, the true and initial parameters are obtained by fitting data into distributions. 

# %% [code]
# Generate initial data
data_1 = beta.rvs(a1_group1, b1_group1, loc=min_1_group1, scale=max_1_group1-min_1_group1, 
                  size=existing_1_customers_group1)
data_0 = beta.rvs(a0_group1, b0_group1, loc=min_0_group1, scale=max_0_group1-min_0_group1, 
                  size=existing_0_customers_group1)

# Generate incoming true data
label1 = beta.rvs(a1_true_group1, b1_true_group1, loc=min_1_group1, scale=max_1_group1-min_1_group1, 
                  size=int(generating_samples_group1*(1-true_pop_prob_group1)))
label0 = beta.rvs(a0_true_group1, b0_true_group1, loc=min_0_group1, scale=max_0_group1-min_0_group1, 
                  size=int(generating_samples_group1*true_pop_prob_group1))

# Obtain initial parameters via initial data
a1_group1, b1_group1, c,d = beta.fit(data_1, fb = b1_group1, floc = min_1_group1, fscale=max_1_group1-min_1_group1)
a0_group1, b0_group1, c,d = beta.fit(data_0, fb = b0_group1, floc = min_0_group1, fscale=max_0_group1-min_0_group1)

# Obtain true parameters via incoming true data
a1_true_group1, b1_group1, c,d = beta.fit(label1, fb = b1_group1, floc = min_1_group1, fscale=max_1_group1-min_1_group1)
a0_true_group1, b0_group1, c,d = beta.fit(label0, fb = b0_group1, floc = min_0_group1, fscale=max_0_group1-min_0_group1)
print ("Initial parameter a1_group1 is ", a1_group1)
print ("Initial parameter a0_group1 is ", a0_group1)
print ("True parameter a1_true_group1 is ", a1_true_group1)
print ("True parameter a0_true_group1 is ", a0_true_group1)

# %% [markdown]
Find the initial classifier threshold and oracle classifier threshold from the initial data and incoming true data respectively. In addition, find out the corresponding LB and UB

# %% [code]
# Find the classifier through Logistic Classifier
X_train = np.append(data_1, data_0).reshape(-1,1)
y_train = np.append(np.ones(len(data_1)),np.zeros(len(data_0))).reshape(-1,)
classifier_1 = LogisticRegression().fit(X_train,y_train)
# Obtain numerical value for classifier_group1 by solving
# 0 = beta_0 + beta_1 * classifier_group1 in logistic regression
classifier_group1 = float(-classifier_1.intercept_/classifier_1.coef_)
print ("Initial classifier is ", classifier_group1)

# Find the LB and UB (Using alpha = 60 for label 0 and median for label 1)
temp = 2*beta.cdf(beta.ppf(reference_quantile,a0_group1,b0_group1,loc=min_0_group1, scale=max_0_group1-min_0_group1),a0_group1,b0_group1,loc=min_0_group1, scale=max_0_group1-min_0_group1) -\
            beta.cdf(classifier_group1,a0_group1,b0_group1,loc=min_0_group1, scale=max_0_group1-min_0_group1)
LB_group1 = max(min_0_group1, float(beta.ppf(temp,a0_group1,b0_group1,loc=min_0_group1, scale=max_0_group1-min_0_group1)))

temp = 2*beta.cdf(beta.ppf(0.5,a1_group1,b1_group1,loc=min_1_group1, scale=max_1_group1-min_1_group1),a1_group1,b1_group1,loc=min_1_group1, scale=max_1_group1-min_1_group1) -\
            beta.cdf(LB_group1,a1_group1,b1_group1,loc=min_1_group1, scale=max_1_group1-min_1_group1)
UB_group1 = min(max_1_group1, float(beta.ppf(temp,a1_group1,b1_group1,loc=min_1_group1, scale=max_1_group1-min_1_group1)))

# Find oracle classifier and its value
X_train_oracle = np.append(label1, label0).reshape(-1,1)
y_train_oracle = np.append(np.ones(len(label1)),np.zeros(len(label0))).reshape(-1,)
classifier_oracle = LogisticRegression().fit(X_train_oracle, y_train_oracle)
classifier_oracle_value = float(-classifier_oracle.intercept_/classifier_oracle.coef_)
print ("Oracle classifier is ", classifier_oracle_value)

# %% [markdown]
Build the info dataframe, which contains the information of ('True Label','Values','Decision','RP_1','RP_0', 'Classifier','Regret','Explore_Prob')

# %% [code]
info_group1 = pd.DataFrame(columns = ['True Label','Values','Decision','RP_1_group1','RP_0_group1',
                                      'Classifier_group1','Explore_Prob_group1','Alpha_1_group1',
                                      'Alpha_0_group1','Regret','acceptwrong','rejectyes'])

# Assign feature values to the dataframe
info_group1['Values'] = np.append(label1, label0)
# Assign true labels to the dataframe
info_group1.loc[0:len(label1),'True Label'] = 1
info_group1.loc[len(label1):,'True Label'] = 0
# Shuffle the dataframe
info_group1 = shuffle(info_group1)
# Resign the index 
info_group1.reset_index(inplace=True, drop=True)

# %% [markdown]
Perform the parameter update once the size of data falling into the updating range reaches the batchsize

# %% [code]
i = 0
# Create loop for updating
while (i <= len(info_group1)-1):
    data_1_trun = []
    data_0_trun = []
    
    # find quantile of reference point including label 0 tail  
    portion_right0_group1 = (beta.sf(beta.ppf(reference_quantile,a0_group1,b0_group1,loc=min_0_group1, scale=max_0_group1-min_0_group1),
                                    a0_group1,b0_group1,loc=min_0_group1, scale=max_0_group1-min_0_group1)
                     /beta.sf(LB_group1,a0_group1,b0_group1,loc=min_0_group1, scale=max_0_group1-min_0_group1))
    portion_left0_group1 = 1 - portion_right0_group1
    
    portion_right1_group1 = (beta.sf(beta.ppf(0.5,a1_group1,b1_group1,loc=min_1_group1, scale=max_1_group1-min_1_group1),
                                    a1_group1,b1_group1,loc=min_1_group1, scale=max_1_group1-min_1_group1)
                     /beta.sf(LB_group1,a1_group1,b1_group1,loc=min_1_group1, scale=max_1_group1-min_1_group1))
    portion_left1_group1 = 1 - portion_right1_group1
    
    k = len(data_0_trun)
    #loop into each batch
    while ((k <= batchsize) & (i <= len(info_group1)-1)):

        # Make decisions
        if (info_group1.loc[i,'Values'] >= classifier_group1) & (info_group1.loc[i,'Values']<=UB_group1):
            info_group1.loc[i,'Decision'] = 1
        elif (info_group1.loc[i,'Values'] < classifier_group1) & (info_group1.loc[i,'Values']>=LB_group1) & (np.random.uniform(size=1)<=exploration_porb_group1):
            info_group1.loc[i,'Decision'] = 1
        elif (info_group1.loc[i,'Values'] >= classifier_group1) & (info_group1.loc[i,'Values']>UB_group1):
            info_group1.loc[i,'Decision'] = 1
        elif (info_group1.loc[i,'Values'] < classifier_group1) & (info_group1.loc[i,'Values']<LB_group1):
            info_group1.loc[i,'Decision'] = 3
        else:
            info_group1.loc[i,'Decision'] = 0  
    
        # Record confusion matrix
        if (info_group1.loc[i,'True Label']==1) & ((info_group1.loc[i,'Decision']==1) or (info_group1.loc[i,'Decision']==2)):
            TP_group1 += 1
        elif (info_group1.loc[i,'True Label']==1) & ((info_group1.loc[i,'Decision']==0) or (info_group1.loc[i,'Decision']==3)):
            FN_group1 += 1
        elif (info_group1.loc[i,'True Label']==0) & ((info_group1.loc[i,'Decision']==0) or (info_group1.loc[i,'Decision']==3)):
            TN_group1 += 1
        else:
            FP_group1 += 1
    
        # Record oracle matrix
        if (classifier_oracle.predict([[info_group1.loc[i,'Values']]]) == 1) & (info_group1.loc[i,'True Label']==1):
            TP_oracle_group1 += 1
        elif (classifier_oracle.predict([[info_group1.loc[i,'Values']]]) == 1) & (info_group1.loc[i,'True Label']==0):
            FP_oracle_group1 += 1
        elif (classifier_oracle.predict([[info_group1.loc[i,'Values']]]) == 0) & (info_group1.loc[i,'True Label']==1):
            FN_oracle_group1 += 1
        else:
            TN_oracle_group1 += 1
    
        
        # Record label 1 information for updating
        if (info_group1.loc[i,'True Label']==1) & (info_group1.loc[i,'Decision']==1):
            data_1 = np.append(data_1, info_group1.loc[i,'Values'])
            if (((info_group1.loc[i,'Values'] < classifier_group1) & (info_group1.loc[i,'Decision']==1)) 
               or ((info_group1.loc[i,'Values'] >= classifier_group1) & (info_group1.loc[i,'Decision']==1) & (np.random.uniform(size=1)<=exploration_porb_group1))):
                data_1_trun = np.append(data_1_trun, info_group1.loc[i,'Values'])
        else:
            data_1 = data_1 
            data_1_trun = data_1_trun
    
        
        # Record label 0 information for updating
        if (info_group1.loc[i,'True Label']==0) & (info_group1.loc[i,'Decision']==1):
            data_0 = np.append(data_0, info_group1.loc[i,'Values'])
            if (((info_group1.loc[i,'Values'] < classifier_group1) & (info_group1.loc[i,'Decision']==1)) 
                or ((info_group1.loc[i,'Values'] >= classifier_group1) & (np.random.uniform(size=1)<=exploration_porb_group1))):
                data_0_trun = np.append(data_0_trun, info_group1.loc[i,'Values'])
        else:
            data_0 = data_0 
            data_0_trun = data_0_trun
        
        k = len(data_0_trun)
        i = i + 1
        
    # Record new mean value/RP and classifier
    info_group1.loc[i-1,'RP_1_group1'] = np.quantile(data_1_trun, portion_left1_group1) 
    info_group1.loc[i-1,'RP_0_group1'] =  np.quantile(data_0_trun, portion_left0_group1) 
    info_group1.loc[i-1,'Classifier_group1'] = classifier_group1
    info_group1.loc[i-1,'Regret'] = (FP_group1 + FN_group1)-(FP_oracle_group1 + FN_oracle_group1)
    info_group1.loc[i-1,'Explore_Prob_group1'] = exploration_porb_group1
    
    info_group1.loc[i-1,'acceptwrong'] = FP_group1
    info_group1.loc[i-1,'rejectyes'] = FN_group1
    
    x = np.arange(0.01,10,0.01)
    # Reassign new values to parameters
    def f(alpha):
        return abs(beta.cdf(info_group1.loc[i-1,'RP_1_group1'], alpha, b1_group1, loc=min_1_group1, scale=max_1_group1-min_1_group1) - 0.5)
    info_group1.loc[i-1,'Alpha_1_group1'] = np.argmin(f(x))*0.01
    
    def f(alpha):
        return abs(beta.cdf(info_group1.loc[i-1,'RP_0_group1'], alpha, b0_group1, loc=min_0_group1, scale=max_0_group1-min_0_group1) - reference_quantile)
    info_group1.loc[i-1,'Alpha_0_group1'] = np.argmin(f(x))*0.01
    
    a1_group1 = info_group1.loc[i-1,'Alpha_1_group1']
    a0_group1 = info_group1.loc[i-1,'Alpha_0_group1']
    
    # Update classifier, UB and LB
    X_train = np.append(data_1, data_0).reshape(-1,1)
    y_train = np.append(np.ones(len(data_1)),np.zeros(len(data_0))).reshape(-1,)
    classifier_1 = LogisticRegression().fit(X_train, y_train)
    classifier_group1 = float(-classifier_1.intercept_/classifier_1.coef_)
    
    temp = 2*beta.cdf(beta.ppf(reference_quantile,a0_group1,b0_group1,loc=min_0_group1, scale=max_0_group1-min_0_group1),a0_group1,b0_group1,loc=min_0_group1, scale=max_0_group1-min_0_group1) -\
            beta.cdf(classifier_group1,a0_group1,b0_group1,loc=min_0_group1, scale=max_0_group1-min_0_group1)
    LB_group1 = max(min_0_group1, float(beta.ppf(temp,a0_group1,b0_group1,loc=min_0_group1, scale=max_0_group1-min_0_group1)))

    temp = 2*beta.cdf(beta.ppf(0.5,a1_group1,b1_group1,loc=min_1_group1, scale=max_1_group1-min_1_group1),a1_group1,b1_group1,loc=min_1_group1, scale=max_1_group1-min_1_group1) -\
            beta.cdf(LB_group1,a1_group1,b1_group1,loc=min_1_group1, scale=max_1_group1-min_1_group1)
    UB_group1 = min(max_1_group1, float(beta.ppf(temp,a1_group1,b1_group1,loc=min_1_group1, scale=max_1_group1-min_1_group1)))
    
    # Update exploration probability
    theoretical_value_group1 = beta.sf(classifier_group1,a0_group1,b0_group1,loc=min_0_group1, scale=max_0_group1-min_0_group1) \
                                /beta.sf(LB_group1,a0_group1,b0_group1,loc=min_0_group1, scale=max_0_group1-min_0_group1)
    experiment_value_group1 = len(data_0_trun[data_0_trun>=classifier_group1])/len(data_0_trun[data_0_trun>=LB_group1])
    diff_group1 = abs(theoretical_value_group1 - experiment_value_group1)
    exploration_porb_group1 = 1 - 0.1*(i//(generating_samples_group1/10)) 

# %% [code]
# Add initial information to thhe DataFrame
initial_information = []
initial_information.insert(0, {'True Label':'NA','Values':'NA','Decision':'NA','RP_1_group1':'NA','RP_0_group1':'NA',
                                      'Classifier_group1':'NA','Explore_Prob_group1':1,'Alpha_1_group1':a1_init_group1,
                                      'Alpha_0_group1':a0_init_group1,'Regret':0,'acceptwrong':0, 'rejectyes':0})
info_group1 = pd.concat([pd.DataFrame(initial_information), info_group1], ignore_index=True)

# %% [markdown]
Performance visualization

# %% [code]
plt.plot(np.arange(1,len(info_group1['Alpha_1_group1'].dropna()),1),info_group1['Alpha_1_group1'].dropna()[:len(info_group1['Alpha_1_group1'].dropna())-1],
         lw=4,color='red',marker='^',ms=14, markevery=2,markerfacecolor='red')
plt.plot(np.arange(1,len(info_group1['Alpha_0_group1'].dropna()),1),info_group1['Alpha_0_group1'].dropna()[:len(info_group1['Alpha_0_group1'].dropna())-1],
         lw=4,color='green', marker='o',ms=14, markevery=2,markerfacecolor='green')
plt.legend(['Alpha_1','Alpha_0'],fontsize=20)
plt.title("Initial Biased Beta: $B^1$(7,3)/$B^0$(2,5); True Beta: $B^1$(5,3)/$B^0$(3,5)",fontsize=15)
plt.xlabel('Number of Updates', fontsize=20)
plt.ylabel('Alpha Estimates', fontsize=20)
plt.show()


plt.plot(np.arange(1,len(info_group1['RP_1_group1'].dropna()),1),info_group1['Alpha_1_group1'].dropna()[:len(info_group1['Alpha_1_group1'].dropna())-1]-a1_true_group1,
         lw=4,color='red',marker='^',ms=14, markevery=40,markerfacecolor='red')
plt.plot(np.arange(1,len(info_group1['RP_0_group1'].dropna()),1),info_group1['Alpha_0_group1'].dropna()[:len(info_group1['Alpha_0_group1'].dropna())-1]-a0_true_group1,
         lw=4,color='green', marker='o',ms=14, markevery=40,markerfacecolor='green')
plt.legend(['Alpha_1_group1','Alpha_0_group1'],fontsize=20)
plt.xlabel('Number of Updates', fontsize=20)
plt.ylabel('Alpha Estimates w.r.t. True', fontsize=20)
plt.show()

plt.plot(np.arange(1,len(info_group1['Explore_Prob_group1'].dropna())+1,1),info_group1['Explore_Prob_group1'].dropna(),
         lw=4,color='black',marker='^',ms=14, markevery=40,markerfacecolor='black')
plt.legend(['Explore_Prob_group1'],fontsize=20)
plt.xlabel('Number of Updates', fontsize=20)
plt.ylabel('Explore_Prob_group1', fontsize=20)
plt.show()

plt.plot(info_group1['Regret'].dropna().index,info_group1['Regret'].dropna(),
         lw=4,color='black',marker='^',ms=14, markevery=40,markerfacecolor='black')
plt.legend(['Regret'],fontsize=20)
plt.xlabel('Number of Samples Observed', fontsize=20)
plt.ylabel('Regret', fontsize=20)
plt.show()

# %% [code]
%store
# %store -r

# %% [code]
info_group1.to_csv('beta_1_group_nofair_FNFP60.csv')

# %% [code]
x1 = np.linspace(0, 30000, 7)
data_1 = np.array([5,5,5,5,5])
mean_1 = np.mean(data_1)
sd_1 = np.std(data_1, ddof=1) 

data_2 = np.array([4.53, 4.59, 4.57, 4.55, 4.53])
mean_2 = np.mean(data_2)
sd_2 = np.std(data_2, ddof=1) 

data_3 = np.array([4, 4.05, 4.02, 4.01, 4.05])
mean_3 = np.mean(data_3)
sd_3 = np.std(data_3, ddof=1) 

data_4 = np.array([3.61, 3.6, 3.58, 3.59, 3.55])
mean_4 = np.mean(data_4)
sd_4 = np.std(data_4, ddof=1) 

data_5 = np.array([3.26, 3.24, 3.2, 3.2, 3.21])
mean_5 = np.mean(data_5)
sd_5 = np.std(data_5, ddof=1) 

data_6 = np.array([3.1, 3.05, 3.02, 3.03, 3.05])
mean_6 = np.mean(data_6)
sd_6 = np.std(data_6, ddof=1) 

data_7 = np.array([3, 3.02, 2.94, 3, 3.02])
mean_7 = np.mean(data_7)
sd_7 = np.std(data_7, ddof=1) 

x2 = np.linspace(0, 20000, 5)
bdata_1 = np.array([5,5,5,5,5])
bmean_1 = np.mean(bdata_1)
bsd_1 = np.std(bdata_1, ddof=1) 

bdata_2 = np.array([4.76, 4.65, 4.75, 4.64, 4.72])
bmean_2 = np.mean(bdata_2)
bsd_2 = np.std(bdata_2, ddof=1) 

bdata_3 = np.array([4.46, 4.3, 4.41, 4.34, 4.4])
bmean_3 = np.mean(bdata_3)
bsd_3 = np.std(bdata_3, ddof=1) 

bdata_4 = np.array([4.07, 3.97, 4.04, 3.97, 4.04])
bmean_4 = np.mean(bdata_4)
bsd_4 = np.std(bdata_4, ddof=1) 

bdata_5 = np.array([3.68, 3.59, 3.69, 3.62, 3.68])
bmean_5 = np.mean(bdata_5)
bsd_5 = np.std(bdata_5, ddof=1) 


x3 = np.linspace(0, 15000, 4)

cdata_1 = np.array([5,5,5,5,5])
cmean_1 = np.mean(cdata_1)
csd_1 = np.std(cdata_1, ddof=1) 

cdata_2 = np.array([4.82, 4.83, 4.83, 4.9, 4.87])
cmean_2 = np.mean(cdata_2)
csd_2 = np.std(cdata_2, ddof=1) 

cdata_3 = np.array([4.62, 4.68, 4.66, 4.75, 4.68])
cmean_3 = np.mean(cdata_3)
csd_3 = np.std(cdata_3, ddof=1) 

cdata_4 = np.array([4.34, 4.47, 4.4, 4.45, 4.44])
cmean_4 = np.mean(cdata_4)
csd_4 = np.std(cdata_4, ddof=1) 


line = np.array([mean_1, mean_2, mean_3, mean_4, mean_5, mean_6, mean_7])
line_sd = np.array([sd_1, sd_2, sd_3, sd_4, sd_5, sd_6, sd_7])
plt.plot(x1, line, lw=1,color='red',marker='^',ms=10, markevery=1,markerfacecolor='red')
plt.fill_between(x1, line+line_sd, line-line_sd, alpha=0.3, color = "red")

line2 = np.array([bmean_1, bmean_2, bmean_3, bmean_4, bmean_5])
line2_sd = np.array([bsd_1, bsd_2, bsd_3, bsd_4, bsd_5])
plt.plot(x2, line2, lw=1,color='green', marker='o',ms=10, markevery=1,markerfacecolor='green')

plt.fill_between(x2, line2 - line2_sd, line2 + line2_sd, alpha=0.3, color = "green")

line3 = np.array([cmean_1, cmean_2, cmean_3, cmean_4])
line3_sd = np.array([csd_1, csd_2, csd_3, csd_4])
plt.plot(x3, line3, lw=1,color='blue', marker='s',ms=10, markevery=1,markerfacecolor='blue')

plt.fill_between(x3, line3 - line3_sd, line3 + line3_sd, alpha=0.3, color = "blue")


plt.legend(['50 quantile','55 quantile', '60 quantile'],fontsize=15)
plt.title("Comparison Between Different Depth of Exploration",fontsize=15)
plt.xlabel('Number of Unqualified Individuals Accepted', fontsize=20)
plt.ylabel('Alpha Estimates', fontsize=20)


# %% [code]
x1 = np.linspace(0, 1200, 5)
x1 = np.append(x1, 1300)
data_1 = np.array([2,2,2,2,2])
mean_1 = np.mean(data_1)
sd_1 = np.std(data_1, ddof=1) 

data_2 = np.array([4.97, 4.9, 4.98, 5, 5])
mean_2 = np.mean(data_2)
sd_2 = np.std(data_2, ddof=1) 

data_3 = np.array([5.01, 4.9, 4.96, 4.96, 5.01])
mean_3 = np.mean(data_3)
sd_3 = np.std(data_3, ddof=1) 

data_4 = np.array([5, 4.9, 4.98, 4.95, 5.02])
mean_4 = np.mean(data_4)
sd_4 = np.std(data_4, ddof=1) 

data_5 = np.array([5, 4.9, 4.97, 4.99, 5])
mean_5 = np.mean(data_5)
sd_5 = np.std(data_5, ddof=1) 

data_6 = np.array([4.99, 5.02, 4.99, 5.04, 4.98])
mean_6 = np.mean(data_6)
sd_6 = np.std(data_6, ddof=1) 


x2 = np.linspace(0, 1500, 6)
bdata_1 = np.array([2,2,2,2,2])
bmean_1 = np.mean(bdata_1)
bsd_1 = np.std(bdata_1, ddof=1) 

bdata_2 = np.array([4.45, 4.56, 4.51, 4.53, 4.36])
bmean_2 = np.mean(bdata_2)
bsd_2 = np.std(bdata_2, ddof=1) 

bdata_3 = np.array([4.85, 4.83, 4.86, 4.93, 4.85])
bmean_3 = np.mean(bdata_3)
bsd_3 = np.std(bdata_3, ddof=1) 

bdata_4 = np.array([4.93, 4.91, 4.92, 4.95, 4.9])
bmean_4 = np.mean(bdata_4)
bsd_4 = np.std(bdata_4, ddof=1) 

bdata_5 = np.array([4.97, 4.95, 4.96, 5.01, 4.95])
bmean_5 = np.mean(bdata_5)
bsd_5 = np.std(bdata_5, ddof=1) 

bdata_6 = np.array([4.99, 4.92, 4.99, 4.98, 4.98])
bmean_6 = np.mean(bdata_6)
bsd_6 = np.std(bdata_6, ddof=1) 

x3 = np.linspace(0, 1800, 7)

cdata_1 = np.array([2,2,2,2,2])
cmean_1 = np.mean(cdata_1)
csd_1 = np.std(cdata_1, ddof=1) 

cdata_2 = np.array([3.2, 3.5, 3.4, 3.2, 3.3])
cmean_2 = np.mean(cdata_2)
csd_2 = np.std(cdata_2, ddof=1) 

cdata_3 = np.array([4.3, 4.4, 4.3, 4.15, 4.29])
cmean_3 = np.mean(cdata_3)
csd_3 = np.std(cdata_3, ddof=1) 

cdata_4 = np.array([4.88, 4.87, 4.91, 4.65, 4.8])
cmean_4 = np.mean(cdata_4)
csd_4 = np.std(cdata_4, ddof=1) 

cdata_5 = np.array([4.9, 4.91, 4.92, 4.8, 4.9])
cmean_5 = np.mean(cdata_5)
csd_5 = np.std(cdata_5, ddof=1) 

cdata_6 = np.array([4.96, 4.96, 4.95, 4.94, 4.99])
cmean_6 = np.mean(cdata_6)
csd_6 = np.std(cdata_6, ddof=1) 

cdata_7 = np.array([5.01, 4.97, 4.96, 5.01, 5])
cmean_7 = np.mean(cdata_7)
csd_7 = np.std(cdata_7, ddof=1) 


line = np.array([mean_1, mean_2, mean_3, mean_4, mean_5, mean_6])
line_sd = np.array([sd_1, sd_2, sd_3, sd_4, sd_5, sd_6])
plt.plot(x1, line, lw=1,color='red',marker='^',ms=10, markevery=1,markerfacecolor='red')
plt.fill_between(x1, line+line_sd, line-line_sd, alpha=0.3, color = "red")

line2 = np.array([bmean_1, bmean_2, bmean_3, bmean_4, bmean_5, bmean_6])
line2_sd = np.array([bsd_1, bsd_2, bsd_3, bsd_4, bsd_5, bsd_6])
plt.plot(x2, line2, lw=1,color='green', marker='o',ms=10, markevery=1,markerfacecolor='green')

plt.fill_between(x2, line2 - line2_sd, line2 + line2_sd, alpha=0.3, color = "green")

line3 = np.array([cmean_1, cmean_2, cmean_3, cmean_4, cmean_5, cmean_6, cmean_7])
line3_sd = np.array([csd_1, csd_2, csd_3, csd_4, csd_5, csd_6, csd_7])
plt.plot(x3, line3, lw=1,color='blue', marker='s',ms=10, markevery=2,markerfacecolor='blue',alpha = 0.7)

plt.fill_between(x3, line3 - line3_sd, line3 + line3_sd, alpha=0.3, color = "blue")


plt.legend(['50 quantile','55 quantile', '60 quantile'],fontsize=15)
plt.title("Comparison Between Different Depth of Exploration",fontsize=15)
plt.xlabel('Number of Qualified Individuals Rejected', fontsize=20)
plt.ylabel('Alpha Estimates', fontsize=20)

# %% [code]
