# Supplementary material
Source: ML conference proceedings conference paper supplement (https://proceedings.neurips.cc/paper_files/paper/2022/hash/0a166a3d98720697d9028bbe592fa177-Abstract.html)
Supplement: Supplementary file 1 [file 0a166a3d98720697d9028bbe592fa177-Supplemental-Conference.zip › supplement/Code/Gaussian_Experiment.ipynb]

# %% [markdown]
# Adaptive Data Debiasing through Bounded Exploraiton and Fairness

This code is under the Gaussian 1 group no fairness setting

# %% [markdown]
Define true, initial, and other hyper-parameters 

# %% [code]
from scipy.stats import norm
from sklearn.linear_model import LogisticRegression
from statistics import median
from sklearn.utils import shuffle
import numpy as np
import pandas as pd
import matplotlib.pyplot as plt

# Defining True Parameters
mu_1_true_group1 = 10
mu_0_true_group1 = 7
sd = 1 

# Defining Initial Assumed Parameters
mu1_init_group1 = 9
mu0_init_group1 = 6

true_pop_prob_group1 = 0.5
exploration_porb_group1 = 1
generating_samples_group1 = 150000
existing_1_customers_group1 = 1000
existing_0_customers_group1 = 1000
batchsize = 1000
reference_quantile = 0.6

TP_group1 = 0
FP_group1 = 0
FN_group1 = 0
TN_group1 = 0

TP_oracle_group1 = 0 
FP_oracle_group1 = 0
FN_oracle_group1 = 0
TN_oracle_group1 = 0

# %% [markdown]
Generate initial and incoming data and forget initial/true parameters defined above. From now on, the true and initial parameters are obtained by fitting data into distributions. 

# %% [code]
# Generate initial data
data_1 = np.random.normal(mu1_init_group1,sd,size=existing_1_customers_group1)
data_0 = np.random.normal(mu0_init_group1,sd,size=existing_0_customers_group1)

# Generate incoming true data
label1 = np.random.normal(mu_1_true_group1,sd,size =int(generating_samples_group1*(1-true_pop_prob_group1)))
label0 = np.random.normal(mu_0_true_group1,sd,size =int(generating_samples_group1*true_pop_prob_group1))

# Obtain initial parameters via initial data
mu_1_init_group1, sd = norm.fit(data_1, fscale = sd)
mu_0_init_group1, sd = norm.fit(data_0, fscale = sd)

mu_1_group1 = mu_1_init_group1
mu_0_group1 = mu_0_init_group1

# Obtain true parameters via incoming true data
mu_1_true_group1, sd = norm.fit(label1, fscale = sd)
mu_0_true_group1, sd = norm.fit(label0, fscale = sd)
print ("Initial parameter mu_1_group1 is ", mu_1_group1)
print ("Initial parameter mu_0_group1 is ", mu_0_group1)
print ("True parameter mu_1_true_group1 is ", mu_1_true_group1)
print ("True parameter mu_0_true_group1 is ", mu_0_true_group1)

# %% [markdown]
Find the initial classifier threshold and oracle classifier threshold from the initial data and incoming true data respectively. In addition, find out the corresponding LB and UB

# %% [code]
# Find the initial classifier through Logistic Regression model
X_train = np.append(data_1, data_0).reshape(-1,1)
y_train = np.append(np.ones(len(data_1)),np.zeros(len(data_0))).reshape(-1,)
classifier = LogisticRegression().fit(X_train, y_train)

# Obtain numerical value for classifier_group1 by solving
# 0 = beta_0 + beta_1 * classifier_group1 in logistic regression
classifier_group1 = float(-classifier.intercept_/classifier.coef_)
print ("Initial classifier is ", classifier_group1)
# Find the LB and UB (Using alpha = 60 for label 0 and median for label 1)
temp = 2*norm.cdf(norm.ppf(reference_quantile,mu_0_group1,sd),mu_0_group1,sd) -\
            norm.cdf(classifier_group1,mu_0_group1,sd)
LB_group1 = float(norm.ppf(temp,mu_0_group1,sd))

temp = 2*norm.cdf(mu_1_group1,mu_1_group1,sd) -\
            norm.cdf(LB_group1,mu_1_group1,sd)
UB_group1 = float(norm.ppf(temp,mu_1_group1,sd))

# Find oracle classifier and its value
X_train_oracle = np.append(label1, label0).reshape(-1,1)
y_train_oracle = np.append(np.ones(len(label1)),np.zeros(len(label0))).reshape(-1,)
classifier_oracle = LogisticRegression().fit(X_train_oracle, y_train_oracle)
classifier_oracle_value = float(-classifier_oracle.intercept_/classifier_oracle.coef_)
print ("Oracle classifier is ", classifier_oracle_value)

# %% [markdown]
Build the info dataframe, which contains the information of ('True Label','Values','Decision','RP_1','RP_0', 'Classifier','Regret','Explore_Prob')

# %% [code]
info_group1 = pd.DataFrame(columns = ['True Label','Values','Decision','RP_1','RP_0',
                                      'Classifier','Regret','Explore_Prob'])

# Assign feature values to the dataframe
info_group1['Values'] = np.append(label1, label0)
# Assign true labels to the dataframe
info_group1.loc[0:len(label1),'True Label'] = 1
info_group1.loc[len(label1):,'True Label'] = 0
# Shuffle the dataframe
info_group1 = shuffle(info_group1)
# Resign the index 
info_group1.reset_index(inplace=True, drop=True)

# %% [markdown]
Perform the parameter update once the size of data falling into the updating range reaches the batchsize

# %% [code]
i = 0
# Create loop for updating
while (i <= len(info_group1)-1):
    data_1_trun = []
    data_0_trun = []
    
    # find quantile of reference point including label 0 tail
    portion_right_0 = norm.sf(norm.ppf(reference_quantile,mu_0_group1,sd),mu_0_group1,sd)/norm.sf(LB_group1,mu_0_group1,sd)
    portion_left_0 = 1 - portion_right_0
    
    portion_right_1 = norm.sf(norm.ppf(reference_quantile,mu_1_group1,sd),mu_1_group1,sd)/norm.sf(LB_group1,mu_1_group1,sd)
    portion_left_1 = 1 - portion_right_1
    
    k = len(data_0_trun)
    #loop into each batch
    while ((k <= batchsize) & (i <= len(info_group1)-1)):

        # Make decisions
        if (classifier.predict([[info_group1.loc[i,'Values']]]) == 1) & (info_group1.loc[i,'Values']<=UB_group1):
            info_group1.loc[i,'Decision'] = 1
        elif (classifier.predict([[info_group1.loc[i,'Values']]]) == 0) & (info_group1.loc[i,'Values']>=LB_group1) & (np.random.uniform(size=1)<=exploration_porb_group1):
            info_group1.loc[i,'Decision'] = 1
        elif (classifier.predict([[info_group1.loc[i,'Values']]]) == 1) & (info_group1.loc[i,'Values']>UB_group1):
            info_group1.loc[i,'Decision'] = 1
        elif (classifier.predict([[info_group1.loc[i,'Values']]]) == 0) & (info_group1.loc[i,'Values']<LB_group1):
            info_group1.loc[i,'Decision'] = 3
        else:
            info_group1.loc[i,'Decision'] = 0   
    
        # Record confusion matrix
        if (info_group1.loc[i,'True Label']==1) & ((info_group1.loc[i,'Decision']==1) or (info_group1.loc[i,'Decision']==2)):
            TP_group1 += 1
        elif (info_group1.loc[i,'True Label']==1) & ((info_group1.loc[i,'Decision']==0) or (info_group1.loc[i,'Decision']==3)):
            FN_group1 += np.exp(info_group1.loc[i,'Values'] + 4*sd - mu_1_true_group1)
            
        elif (info_group1.loc[i,'True Label']==0) & ((info_group1.loc[i,'Decision']==0) or (info_group1.loc[i,'Decision']==3)):
            TN_group1 += 1
        else:
            FP_group1 += np.exp(4*sd + mu_0_true_group1 - info_group1.loc[i,'Values'])
            
    
        # Record oracle matrix
        if (classifier_oracle.predict([[info_group1.loc[i,'Values']]]) == 1) & (info_group1.loc[i,'True Label']==1):
            TP_oracle_group1 += 1
        elif (classifier_oracle.predict([[info_group1.loc[i,'Values']]]) == 1) & (info_group1.loc[i,'True Label']==0):
            FP_oracle_group1 += np.exp(4*sd + mu_0_true_group1 - info_group1.loc[i,'Values'])
            
        elif (classifier_oracle.predict([[info_group1.loc[i,'Values']]]) == 0) & (info_group1.loc[i,'True Label']==1):
            FN_oracle_group1 += np.exp(info_group1.loc[i,'Values'] + 4*sd - mu_1_true_group1)
            
        else:
            TN_oracle_group1 += 1
    
        
        # Record label 1 information for updating
        if (info_group1.loc[i,'True Label']==1) & ((info_group1.loc[i,'Decision']==1) or (info_group1.loc[i,'Decision']==2)):
            data_1 = np.append(data_1, info_group1.loc[i,'Values'])
            if ((classifier.predict([[info_group1.loc[i,'Values']]]) == 0 & (info_group1.loc[i,'Decision']==1)) 
               or (classifier.predict([[info_group1.loc[i,'Values']]]) == 1 & (info_group1.loc[i,'Decision']==1) & (np.random.uniform(size=1)<=exploration_porb_group1))):
                data_1_trun = np.append(data_1_trun, info_group1.loc[i,'Values'])
        else:
            data_1 = data_1 
            data_1_trun = data_1_trun
        
                
        # Record label 0 information for updating
        if (info_group1.loc[i,'True Label']==0) & ((info_group1.loc[i,'Decision']==1) or (info_group1.loc[i,'Decision']==2)):
            data_0 = np.append(data_0, info_group1.loc[i,'Values'])
            if ((classifier.predict([[info_group1.loc[i,'Values']]]) == 0 & (info_group1.loc[i,'Decision']==1)) 
                or (classifier.predict([[info_group1.loc[i,'Values']]]) == 1 & (np.random.uniform(size=1)<=exploration_porb_group1))):
                data_0_trun = np.append(data_0_trun, info_group1.loc[i,'Values'])
        else:
            data_0 = data_0 
            data_0_trun = data_0_trun 
        
        k = len(data_0_trun)
        i = i + 1
        
    # Record new mean value/RP and classifier
    info_group1.loc[i-1,'RP_1'] = np.quantile(data_1_trun, portion_left_1) - norm.ppf(reference_quantile,0,sd)
    info_group1.loc[i-1,'RP_0'] =  np.quantile(data_0_trun, portion_left_0) - norm.ppf(reference_quantile,0,sd)
    info_group1.loc[i-1,'Classifier'] = classifier_group1
    info_group1.loc[i-1,'Regret'] = (FP_group1 + FN_group1)-(FP_oracle_group1 + FN_oracle_group1)
    info_group1.loc[i-1,'Explore_Prob'] = exploration_porb_group1
    
    # Reassign new values to parameters
    mu_1_group1 = info_group1.loc[i-1,'RP_1']
    mu_0_group1 = info_group1.loc[i-1,'RP_0']
    
    # Update classifier, UB and LB
    X_train = np.append(data_1, data_0).reshape(-1,1)
    y_train = np.append(np.ones(len(data_1)),np.zeros(len(data_0))).reshape(-1,)
    classifier = LogisticRegression().fit(X_train, y_train)

    # Obtain numerical value for classifier_group1 by solving
    # 0 = beta_0 + beta_1 * classifier_group1
    classifier_group1 = float(-classifier.intercept_/classifier.coef_)
    temp = 2*norm.cdf(norm.ppf(reference_quantile,mu_0_group1,sd),mu_0_group1,sd) -\
            norm.cdf(classifier_group1,mu_0_group1,sd)
    LB_group1 = norm.ppf(temp,mu_0_group1,sd)

    temp = 2*norm.cdf(mu_1_group1,mu_1_group1,sd) -\
            norm.cdf(LB_group1,mu_1_group1,sd)
    UB_group1 = norm.ppf(temp,mu_1_group1,sd)
    
    theoretical_value = norm.sf(classifier_group1,mu_0_group1,sd)/norm.sf(LB_group1,mu_0_group1,sd)
    experiment_value = len(data_0_trun[data_0_trun>=classifier_group1])/len(data_0_trun[data_0_trun>=LB_group1])
    diff = abs(theoretical_value - experiment_value)
    #exploration_porb_group1 = 1 - 0.1*(i//(generating_samples_group1/10)) 
    exploration_porb_group1 = abs(mu_0_group1 - mu_0_true_group1)

# %% [code]
# Add initial information to thhe DataFrame
initial_information = []
initial_information.insert(0, {'True Label': 'NA','Values': 'NA','Decision': 'NA','RP_1': mu_1_init_group1,'RP_0': mu_0_init_group1,
                                      'Classifier': 'NA','Regret': 0,'Explore_Prob': 1})
info_group1 = pd.concat([pd.DataFrame(initial_information), info_group1], ignore_index=True)

# %% [markdown]
Performance visualization

# %% [code]
plt.plot(np.arange(1,len(info_group1['RP_1'].dropna()),1),info_group1['RP_1'].dropna()[:len(info_group1['RP_1'].dropna())-1],
         lw=4,color='red',marker='^',ms=14, markevery=40,markerfacecolor='red')
plt.plot(np.arange(1,len(info_group1['RP_0'].dropna()),1),info_group1['RP_0'].dropna()[:len(info_group1['RP_0'].dropna())-1],
         lw=4,color='green', marker='o',ms=14, markevery=40,markerfacecolor='green')
plt.legend(['mu_1','mu_0'],fontsize=20)
plt.xlabel('Number of Updates', fontsize=20)
plt.ylabel('Mean Estimates', fontsize=20)
plt.show()

plt.plot(info_group1['RP_1'].dropna().index[:len(info_group1['RP_1'].dropna())-1],info_group1['RP_1'].dropna()[:len(info_group1['RP_1'].dropna())-1],
         lw=4,color='red',marker='^',ms=14, markevery=40,markerfacecolor='red')
plt.plot(info_group1['RP_0'].dropna().index[:len(info_group1['RP_0'].dropna())-1],info_group1['RP_0'].dropna()[:len(info_group1['RP_0'].dropna())-1],
         lw=4,color='green', marker='o',ms=14, markevery=40,markerfacecolor='green')
plt.legend(['mu_1','mu_0'],fontsize=20)
plt.xlabel('Number of Samples Observed', fontsize=20)
plt.ylabel('Mean Estimates', fontsize=20)
plt.show()

plt.plot(np.arange(1,len(info_group1['RP_1'].dropna()),1),info_group1['RP_1'].dropna()[:len(info_group1['RP_1'].dropna())-1]-mu_1_true_group1,
         lw=4,color='red',marker='^',ms=14, markevery=40,markerfacecolor='red')
plt.plot(np.arange(1,len(info_group1['RP_0'].dropna()),1),info_group1['RP_0'].dropna()[:len(info_group1['RP_0'].dropna())-1]-mu_0_true_group1,
         lw=4,color='green', marker='o',ms=14, markevery=40,markerfacecolor='green')
plt.legend(['mu_1_group1','mu_0_group1'],fontsize=20)
plt.xlabel('Number of Updates', fontsize=20)
plt.ylabel('Difference Between Estimates and True Value', fontsize=20)
plt.show()

plt.plot(np.arange(1,len(info_group1['Explore_Prob'].dropna())+1,1),info_group1['Explore_Prob'].dropna(),lw=4,color='black',marker='^',ms=14, markevery=40,markerfacecolor='black')
plt.legend(['Explore_Prob'],fontsize=20)
plt.xlabel('Number of Updates', fontsize=20)
plt.ylabel('Explore_Prob', fontsize=20)
plt.show()

plt.plot(info_group1['Regret'].dropna().index,info_group1['Regret'].dropna(),lw=4,color='black',marker='^',ms=14, markevery=40,markerfacecolor='black')
plt.legend(['Regret'],fontsize=20)
plt.xlabel('Number of Samples Observed', fontsize=20)
plt.ylabel('Regret', fontsize=20)
plt.show()

# %% [code]
#%store
%store -r

# %% [code]
info_group1.to_csv('Gaussian_1_group_nofair_60weightedregret.csv')
#object_name = pd.read_csv('file_name.csv')

# %% [code]
plt.plot(info_group1['Classifier'].dropna().index[1:],info_group1['Classifier'].dropna()[1:],
         lw=4,color='black',marker='^',ms=14, markevery=40,markerfacecolor='black')
plt.legend(['Classifier'],fontsize=20)
plt.xlabel('Number of Samples Observed', fontsize=20)
plt.ylabel('Classifier', fontsize=20)
plt.show()

# %% [code]
